# Supplementary material
Source: PubMed Central journal article supplement (PMC6943992)
Supplement: Online_Supplemental_Results.pdf [file Online_Supplemental_Results.pdf]

## Online Supplemental Results

Contents:

1. Additional Results Tables for Simulation 1.
2. Additional Results Tables for Simulation 2.

**Table 1**

Percent Bias in Models Omitting the Unique Factor Correlations by Parameter and Simulation Condition, Simulation 1:  
 $N = 125$ , 1 Unique Factor Correlation.

| Path:                          | Regression FS |               |               | Bartlett FS   |               |               | Croon    |              |              | SEM          |              |              |
|--------------------------------|---------------|---------------|---------------|---------------|---------------|---------------|----------|--------------|--------------|--------------|--------------|--------------|
|                                | <i>a</i>      | <i>b</i>      | <i>ab</i>     | <i>a</i>      | <i>b</i>      | <i>ab</i>     | <i>a</i> | <i>b</i>     | <i>ab</i>    | <i>a</i>     | <i>b</i>     | <i>ab</i>    |
| Unique Factor Correlation = .1 |               |               |               |               |               |               |          |              |              |              |              |              |
| $\alpha(.7)$                   |               |               |               |               |               |               |          |              |              |              |              |              |
| CS                             | <b>-29.65</b> | <b>-29.14</b> | <b>-50.08</b> | <b>-29.83</b> | <b>-29.11</b> | <b>-50.34</b> | -0.92    | -3.22        | -4.11        | 2.13         | -0.40        | 1.57         |
| MS                             | <b>-29.65</b> | <b>-10.07</b> | <b>-36.14</b> | <b>-29.83</b> | <b>-10.1</b>  | <b>-36.44</b> | -0.92    | <b>26.67</b> | <b>26.29</b> | <b>14.28</b> | <b>39.98</b> | <b>60.85</b> |
| $\alpha(.8)$                   |               |               |               |               |               |               |          |              |              |              |              |              |
| CS                             | <b>-18.84</b> | <b>-18.97</b> | <b>-34.18</b> | <b>-18.88</b> | <b>-18.55</b> | <b>-33.93</b> | 0.46     | -0.28        | 0.30         | 1.95         | 1.30         | 3.45         |
| MS                             | <b>-18.84</b> | 4.33          | <b>-14.78</b> | <b>-18.88</b> | 4.85          | <b>-14.43</b> | 0.46     | <b>29.83</b> | <b>31.04</b> | <b>10.96</b> | <b>38.14</b> | <b>53.97</b> |
| $\alpha(.9)$                   |               |               |               |               |               |               |          |              |              |              |              |              |
| CS                             | -9.96         | -9.97         | <b>-18.93</b> | -9.99         | -9.93         | <b>-18.97</b> | -0.23    | -0.47        | -0.74        | 0.32         | 0.14         | 0.43         |
| MS                             | -9.96         | <b>16.66</b>  | 5.52          | -9.99         | <b>16.71</b>  | 5.50          | -0.23    | <b>29.35</b> | <b>29.5</b>  | 5.29         | <b>33.23</b> | <b>40.78</b> |
| Unique Factor Correlation = .3 |               |               |               |               |               |               |          |              |              |              |              |              |
| $\alpha(.7)$                   |               |               |               |               |               |               |          |              |              |              |              |              |
| CS                             | <b>-26.67</b> | <b>-26.7</b>  | <b>-46.28</b> | <b>-26.7</b>  | <b>-26.67</b> | <b>-46.37</b> | 3.25     | 1.24         | 4.57         | 8.24         | 6.05         | <b>14.93</b> |
| MS                             | <b>-26.67</b> | -6.74         | <b>-31.14</b> | <b>-26.7</b>  | -6.75         | <b>-31.22</b> | 3.25     | <b>31.33</b> | <b>36.26</b> | <b>19.83</b> | <b>46.01</b> | <b>75.53</b> |
| $\alpha(.8)$                   |               |               |               |               |               |               |          |              |              |              |              |              |
| CS                             | <b>-17.33</b> | <b>-17.31</b> | <b>-31.52</b> | <b>-17.47</b> | <b>-17.08</b> | <b>-31.55</b> | 2.40     | 1.90         | 4.50         | 4.38         | 3.78         | 8.47         |
| MS                             | <b>-17.33</b> | 6.23          | <b>-11.63</b> | <b>-17.47</b> | 6.48          | <b>-11.63</b> | 2.40     | <b>31.93</b> | <b>35.7</b>  | <b>13.35</b> | <b>40.72</b> | <b>60.15</b> |
| $\alpha(.9)$                   |               |               |               |               |               |               |          |              |              |              |              |              |
| CS                             | -9.35         | -9.35         | <b>-17.8</b>  | -9.28         | -9.34         | <b>-17.77</b> | 0.44     | 0.2          | 0.64         | 1.11         | 0.84         | 1.96         |
| MS                             | -9.35         | <b>17.96</b>  | 7.46          | -9.28         | <b>17.95</b>  | 7.51          | 0.44     | <b>30.71</b> | <b>31.81</b> | 6.29         | <b>34.8</b>  | <b>43.84</b> |
| Unique Factor Correlation = .5 |               |               |               |               |               |               |          |              |              |              |              |              |
| $\alpha(.7)$                   |               |               |               |               |               |               |          |              |              |              |              |              |
| CS                             | <b>-24.49</b> | <b>-25.05</b> | <b>-43.41</b> | <b>-24.32</b> | <b>-25.21</b> | <b>-43.47</b> | 6.73     | 4.07         | <b>11.37</b> | <b>16.93</b> | <b>12.41</b> | <b>31.99</b> |
| MS                             | <b>-24.49</b> | -3.69         | <b>-26.72</b> | <b>-24.32</b> | -3.90         | <b>-26.71</b> | 6.73     | <b>35.87</b> | <b>45.86</b> | <b>28.5</b>  | <b>54.77</b> | <b>99.57</b> |
| $\alpha(.8)$                   |               |               |               |               |               |               |          |              |              |              |              |              |
| CS                             | <b>-16.55</b> | <b>-16.94</b> | <b>-30.58</b> | <b>-16.67</b> | <b>-16.8</b>  | <b>-30.62</b> | 3.50     | 2.39         | 6.08         | 6.88         | 5.28         | <b>12.58</b> |
| MS                             | <b>-16.55</b> | 7.12          | <b>-10.03</b> | <b>-16.67</b> | 7.28          | <b>-10.04</b> | 3.50     | <b>33.12</b> | <b>38.38</b> | <b>16.19</b> | <b>43.59</b> | <b>67.43</b> |
| $\alpha(.9)$                   |               |               |               |               |               |               |          |              |              |              |              |              |
| CS                             | -8.31         | -8.73         | <b>-16.25</b> | -8.34         | -8.63         | <b>-16.21</b> | 1.61     | 1.06         | 2.74         | 2.48         | 1.93         | 4.53         |
| MS                             | -8.31         | <b>18.64</b>  | 9.28          | -8.34         | <b>18.76</b>  | 9.34          | 1.61     | <b>31.62</b> | <b>34.22</b> | 7.65         | <b>35.97</b> | <b>46.89</b> |

Note: Regression FS = regression FSR method, Bartlett FS = Bartlett FSR method, Croon = Croon's method using the original formulas uncorrected for unique factor correlations, SEM = Structural Equation Modeling (Simultaneous Estimation) under the assumption of conditionally independent uniquenesses, CS = correct structural model specification ( $c'$  path freely estimated), MS = structural misspecification ( $c'$  path constrained to 0). Bold entries indicate absolute values of percent bias > 10.

**Table 2**

Percent Bias in Models Correctly Specifying the Unique Factor Structure by Parameter and Simulation Condition,  
Simulation 1:  $N = 125$ , 1 Unique Factor Correlation.

| Path:                          | Hoshino-Bentler |              |              | Croon FM |              |              | Croon MM |              |              | SEM          |              |              |
|--------------------------------|-----------------|--------------|--------------|----------|--------------|--------------|----------|--------------|--------------|--------------|--------------|--------------|
|                                | <i>a</i>        | <i>b</i>     | <i>ab</i>    | <i>a</i> | <i>b</i>     | <i>ab</i>    | <i>a</i> | <i>b</i>     | <i>ab</i>    | <i>a</i>     | <i>b</i>     | <i>ab</i>    |
| Unique Factor Correlation = .1 |                 |              |              |          |              |              |          |              |              |              |              |              |
| $\alpha(.7)$                   |                 |              |              |          |              |              |          |              |              |              |              |              |
| CS                             | 1.64            | -0.79        | 0.71         | -2.73    | -4.65        | -7.31        | -0.06    | -1.87        | -2.11        | -0.06        | -1.87        | -2.11        |
| MS                             | 1.64            | <b>30.13</b> | <b>33.02</b> | -2.73    | <b>24.71</b> | <b>22.09</b> | -0.06    | <b>28.49</b> | <b>29.12</b> | <b>12.09</b> | <b>37.73</b> | <b>55.29</b> |
| $\alpha(.8)$                   |                 |              |              |          |              |              |          |              |              |              |              |              |
| CS                             | 1.76            | 1.13         | 3.09         | -0.59    | -0.95        | -1.44        | 0.75     | 0.53         | 1.43         | 0.75         | 0.53         | 1.43         |
| MS                             | 1.76            | 31.6         | 34.55        | -0.59    | 28.80        | 28.66        | 0.75     | <b>30.67</b> | <b>32.27</b> | 9.71         | <b>37.00</b> | <b>51.03</b> |
| $\alpha(.9)$                   |                 |              |              |          |              |              |          |              |              |              |              |              |
| CS                             | 0.26            | 0.10         | 0.33         | -0.71    | -0.82        | -1.56        | -0.21    | -0.18        | -0.41        | -0.21        | -0.18        | -0.41        |
| MS                             | 0.26            | 30.05        | 30.85        | -0.71    | 28.84        | 28.37        | -0.21    | 29.60        | 29.79        | 4.71         | 32.71        | 39.46        |
| Unique Factor Correlation = .3 |                 |              |              |          |              |              |          |              |              |              |              |              |
| $\alpha(.7)$                   |                 |              |              |          |              |              |          |              |              |              |              |              |
| CS                             | 5.43            | 3.94         | 9.63         | -2.32    | -2.92        | -5.3         | 0.46     | 0.83         | 1.21         | 0.46         | 0.83         | 1.21         |
| MS                             | 5.43            | <b>34.25</b> | <b>42.17</b> | -2.32    | <b>25.55</b> | <b>23.25</b> | 0.46     | <b>29.64</b> | <b>30.84</b> | <b>11.56</b> | <b>38.04</b> | <b>54.72</b> |
| $\alpha(.8)$                   |                 |              |              |          |              |              |          |              |              |              |              |              |
| CS                             | 3.28            | 2.81         | 6.31         | -0.90    | -0.58        | -1.34        | 0.28     | 0.76         | 1.18         | 0.28         | 0.76         | 1.18         |
| MS                             | 3.28            | <b>33.22</b> | <b>38.19</b> | -0.90    | <b>28.47</b> | <b>27.94</b> | 0.28     | <b>30.22</b> | 31.21        | 8.57         | <b>36.00</b> | <b>48.38</b> |
| $\alpha(.9)$                   |                 |              |              |          |              |              |          |              |              |              |              |              |
| CS                             | 0.79            | 0.60         | 1.39         | -1.02    | -0.82        | -1.83        | -0.56    | -0.23        | -0.79        | -0.56        | -0.23        | -0.79        |
| MS                             | 0.79            | <b>31.24</b> | <b>32.80</b> | -1.02    | <b>29.22</b> | <b>28.42</b> | -0.56    | <b>29.94</b> | <b>29.74</b> | 4.15         | <b>32.87</b> | <b>38.96</b> |
| Unique Factor Correlation = .5 |                 |              |              |          |              |              |          |              |              |              |              |              |
| $\alpha(.7)$                   |                 |              |              |          |              |              |          |              |              |              |              |              |
| CS                             | 8.27            | 6.77         | <b>15.85</b> | -2.54    | -3.29        | -5.74        | -0.18    | 0.84         | 0.66         | -0.18        | 0.84         | 0.66         |
| MS                             | 8.27            | <b>38.42</b> | <b>50.67</b> | -2.54    | <b>25.90</b> | <b>23.52</b> | -0.18    | <b>29.95</b> | <b>30.47</b> | <b>10.59</b> | <b>38.07</b> | <b>53.65</b> |
| $\alpha(.8)$                   |                 |              |              |          |              |              |          |              |              |              |              |              |
| CS                             | 4.23            | 3.13         | 7.53         | -1.94    | -1.60        | -3.45        | -0.82    | -0.18        | -0.98        | -0.82        | -0.18        | -0.98        |
| MS                             | 4.23            | <b>34.22</b> | <b>40.48</b> | -1.94    | <b>27.42</b> | <b>25.58</b> | -0.82    | <b>29.17</b> | <b>28.72</b> | 6.91         | <b>34.52</b> | <b>44.55</b> |
| $\alpha(.9)$                   |                 |              |              |          |              |              |          |              |              |              |              |              |
| CS                             | 1.89            | 1.41         | 3.39         | -0.85    | -0.64        | -1.42        | -0.43    | -0.04        | -0.40        | -0.43        | -0.04        | -0.4         |
| MS                             | 1.89            | <b>32.07</b> | <b>35.06</b> | -0.85    | <b>29.09</b> | <b>28.50</b> | -0.43    | <b>29.78</b> | <b>29.74</b> | 3.70         | <b>32.37</b> | <b>37.82</b> |

Note: Hoshino-Bentler indicates Hoshino and Bentler's (2013) FSR method, Croon FM = Croon's method corrected for correlated uniquenesses at the factor model level, Croon MM = Croon's method corrected for correlated uniquenesses at the measurement model level, SEM = Structural Equation Modeling (Simultaneous Estimation) correctly specifying the correlated residual structure, CS = correct structural model specification ( $c'$  path freely estimated), MS = structural misspecification ( $c'$  path constrained to 0). Bold entries indicate absolute values of percent bias > 10.

**Table 3**

Percent Bias in Models Omitting the Unique Factor Correlations by Parameter and Simulation Condition, Simulation 1:  
 $N = 250$ , 1 Unique Factor Correlation.

| Path:                          | Regression FS |               |               | Bartlett FS   |               |               | Croon    |              |              | SEM          |              |               |
|--------------------------------|---------------|---------------|---------------|---------------|---------------|---------------|----------|--------------|--------------|--------------|--------------|---------------|
|                                | <i>a</i>      | <i>b</i>      | <i>ab</i>     | <i>a</i>      | <i>b</i>      | <i>ab</i>     | <i>a</i> | <i>b</i>     | <i>ab</i>    | <i>a</i>     | <i>b</i>     | <i>ab</i>     |
| Unique Factor Correlation = .1 |               |               |               |               |               |               |          |              |              |              |              |               |
| $\alpha(.7)$                   |               |               |               |               |               |               |          |              |              |              |              |               |
| CS                             | <b>-29.10</b> | <b>-27.71</b> | <b>-48.71</b> | <b>-28.98</b> | <b>-27.50</b> | <b>-48.50</b> | 0.66     | 0.36         | 1.10         | 2.24         | 1.90         | 4.29          |
| MS                             | <b>-29.10</b> | -8.62         | <b>-34.94</b> | <b>-28.98</b> | -8.37         | <b>-34.65</b> | 0.66     | <b>30.18</b> | <b>31.43</b> | <b>14.15</b> | <b>41.31</b> | <b>61.71</b>  |
| $\alpha(.8)$                   |               |               |               |               |               |               |          |              |              |              |              |               |
| CS                             | <b>-19.46</b> | <b>-18.33</b> | <b>-34.19</b> | <b>-19.43</b> | <b>-18.38</b> | <b>-34.26</b> | 0.41     | 0.53         | 0.97         | 1.16         | 1.27         | 2.46          |
| MS                             | <b>-19.46</b> | 4.72          | <b>-15.42</b> | <b>-19.43</b> | 4.64          | <b>-15.47</b> | 0.41     | <b>30.47</b> | <b>31.26</b> | <b>10.22</b> | <b>37.74</b> | <b>52.10</b>  |
| $\alpha(.9)$                   |               |               |               |               |               |               |          |              |              |              |              |               |
| CS                             | -9.96         | <b>-10.03</b> | <b>-18.99</b> | <b>-10.00</b> | <b>-10.03</b> | <b>-19.04</b> | -0.10    | -0.56        | -0.67        | 0.18         | -0.26        | -0.10         |
| MS                             | -9.96         | <b>16.79</b>  | 5.41          | <b>-10.00</b> | <b>16.79</b>  | 5.36          | -0.10    | <b>29.60</b> | <b>29.73</b> | 5.19         | <b>33.13</b> | <b>40.31</b>  |
| Unique Factor Correlation = .3 |               |               |               |               |               |               |          |              |              |              |              |               |
| $\alpha(.7)$                   |               |               |               |               |               |               |          |              |              |              |              |               |
| CS                             | <b>-26.72</b> | <b>-25.33</b> | <b>-45.22</b> | <b>-26.86</b> | <b>-25.32</b> | <b>-45.37</b> | 3.86     | 3.60         | 7.75         | 7.02         | 6.41         | <b>14.06</b>  |
| MS                             | <b>-26.72</b> | -5.33         | <b>-30.30</b> | <b>-26.86</b> | -5.34         | <b>-30.45</b> | 3.86     | <b>34.21</b> | <b>39.86</b> | <b>18.99</b> | <b>46.91</b> | <b>75.23</b>  |
| $\alpha(.8)$                   |               |               |               |               |               |               |          |              |              |              |              |               |
| CS                             | <b>-17.92</b> | <b>-17.33</b> | <b>-32.11</b> | <b>-17.81</b> | <b>-17.53</b> | <b>-32.22</b> | 2.43     | 1.82         | 4.33         | 3.67         | 3.01         | 6.83          |
| MS                             | <b>-17.92</b> | 6.50          | <b>-12.31</b> | <b>-17.81</b> | 6.23          | <b>-12.43</b> | 2.43     | <b>32.58</b> | <b>36.11</b> | <b>13.01</b> | <b>40.61</b> | <b>59.24</b>  |
| $\alpha(.9)$                   |               |               |               |               |               |               |          |              |              |              |              |               |
| CS                             | -8.98         | -8.92         | <b>-17.06</b> | -9.02         | -8.92         | <b>-17.13</b> | 1.03     | 0.80         | 1.86         | 1.42         | 1.16         | 2.61          |
| MS                             | -8.98         | <b>18.14</b>  | 7.80          | -9.02         | <b>18.12</b>  | 7.72          | 1.03     | <b>31.13</b> | <b>32.75</b> | <b>6.53</b>  | <b>34.79</b> | <b>43.88</b>  |
| Unique Factor Correlation = .5 |               |               |               |               |               |               |          |              |              |              |              |               |
| $\alpha(.7)$                   |               |               |               |               |               |               |          |              |              |              |              |               |
| CS                             | <b>-23.29</b> | <b>-24.19</b> | <b>-41.79</b> | <b>-23.21</b> | <b>-24.25</b> | <b>-41.83</b> | 8.81     | 5.56         | <b>15.06</b> | <b>17.13</b> | <b>11.89</b> | <b>31.33</b>  |
| MS                             | <b>-23.29</b> | -2.54         | <b>-24.93</b> | <b>-23.21</b> | -2.65         | <b>-24.97</b> | 8.81     | <b>38.09</b> | <b>50.66</b> | <b>28.74</b> | <b>55.40</b> | <b>100.43</b> |
| $\alpha(.8)$                   |               |               |               |               |               |               |          |              |              |              |              |               |
| CS                             | <b>-15.52</b> | <b>-16.52</b> | <b>-29.42</b> | <b>-15.59</b> | <b>-16.38</b> | <b>-29.41</b> | 5.05     | 3.00         | 8.26         | 7.68         | 5.27         | <b>13.42</b>  |
| MS                             | <b>-15.52</b> | 8.21          | -8.29         | <b>-15.59</b> | 8.37          | -8.26         | 5.05     | <b>34.78</b> | <b>41.91</b> | <b>17.08</b> | <b>44.37</b> | <b>69.37</b>  |
| $\alpha(.9)$                   |               |               |               |               |               |               |          |              |              |              |              |               |
| CS                             | -7.72         | -8.40         | <b>-15.48</b> | -7.66         | -8.45         | <b>-15.48</b> | 2.40     | 1.41         | 3.83         | 3.00         | 2.00         | 5.03          |
| MS                             | -7.72         | <b>19.17</b>  | <b>10.19</b>  | -7.66         | <b>19.10</b>  | <b>10.19</b>  | 2.40     | <b>32.18</b> | <b>35.56</b> | 8.20         | <b>36.17</b> | <b>47.56</b>  |

Note: Regression FS = regression FSR method, Bartlett FS = Bartlett FSR method, Croon = Croon's method using the original formulas uncorrected for unique factor correlations, SEM = Structural Equation Modeling (Simultaneous Estimation) under the assumption of conditionally independent uniquenesses, CS = correct structural model specification ( $c'$  path freely estimated), MS = structural misspecification ( $c'$  path constrained to 0). Bold entries indicate absolute values of percent bias > 10.

**Table 4**

Percent Bias in Models Correctly Specifying the Unique Factor Structure by Parameter and Simulation Condition,  
Simulation 1:  $N = 250$ , 1 Unique Factor Correlation.

| Path:                          | Hoshino-Bentler |              |              | Croon FM |              |              | Croon MM |              |              | SEM          |              |              |
|--------------------------------|-----------------|--------------|--------------|----------|--------------|--------------|----------|--------------|--------------|--------------|--------------|--------------|
|                                | <i>a</i>        | <i>b</i>     | <i>ab</i>    | <i>a</i> | <i>b</i>     | <i>ab</i>    | <i>a</i> | <i>b</i>     | <i>ab</i>    | <i>a</i>     | <i>b</i>     | <i>ab</i>    |
| Unique Factor Correlation = .1 |                 |              |              |          |              |              |          |              |              |              |              |              |
| $\alpha(.7)$                   |                 |              |              |          |              |              |          |              |              |              |              |              |
| CS                             | 1.88            | 1.60         | 3.61         | -1.17    | -0.86        | -1.93        | 0.16     | 0.58         | 0.84         | 0.16         | 0.58         | 0.84         |
| MS                             | 1.88            | <b>31.84</b> | <b>34.71</b> | -1.17    | <b>28.3</b>  | <b>27.21</b> | 0.16     | <b>30.16</b> | <b>30.78</b> | <b>12.01</b> | <b>39.20</b> | <b>56.35</b> |
| $\alpha(.8)$                   |                 |              |              |          |              |              |          |              |              |              |              |              |
| CS                             | 1.01            | 1.17         | 2.20         | -0.66    | -0.24        | -0.88        | 0.00     | 0.48         | 0.48         | 0.00         | 0.48         | 0.48         |
| MS                             | 1.01            | <b>31.28</b> | <b>32.85</b> | -0.66    | <b>29.34</b> | <b>28.73</b> | 0.00     | <b>30.25</b> | <b>30.48</b> | 9.00         | <b>36.55</b> | <b>49.13</b> |
| $\alpha(.9)$                   |                 |              |              |          |              |              |          |              |              |              |              |              |
| CS                             | 0.13            | -0.31        | -0.19        | -0.60    | -0.90        | -1.50        | -0.35    | -0.61        | -0.97        | -0.35        | -0.61        | -0.97        |
| MS                             | 0.13            | <b>29.92</b> | <b>30.35</b> | -0.60    | <b>29.10</b> | <b>28.59</b> | -0.35    | <b>29.46</b> | <b>29.26</b> | 4.60         | <b>32.59</b> | <b>38.96</b> |
| Unique Factor Correlation = .3 |                 |              |              |          |              |              |          |              |              |              |              |              |
| $\alpha(.7)$                   |                 |              |              |          |              |              |          |              |              |              |              |              |
| CS                             | 4.47            | 4.61         | 9.45         | -1.81    | -0.57        | -2.29        | -0.60    | 1.21         | 0.72         | -0.60        | 1.21         | 0.72         |
| MS                             | 4.47            | <b>35.34</b> | <b>41.86</b> | -1.81    | <b>28.30</b> | <b>26.42</b> | -0.60    | <b>30.29</b> | <b>29.96</b> | <b>10.79</b> | <b>38.75</b> | <b>54.18</b> |
| $\alpha(.8)$                   |                 |              |              |          |              |              |          |              |              |              |              |              |
| CS                             | 2.68            | 2.28         | 5.06         | -0.94    | -0.55        | -1.46        | -0.34    | 0.29         | -0.02        | -0.34        | 0.29         | -0.02        |
| MS                             | 2.68            | <b>33.08</b> | <b>36.96</b> | -0.94    | <b>29.11</b> | <b>28.22</b> | -0.34    | <b>30.07</b> | <b>29.95</b> | 8.32         | <b>36.05</b> | <b>47.74</b> |
| $\alpha(.9)$                   |                 |              |              |          |              |              |          |              |              |              |              |              |
| CS                             | 1.11            | 0.92         | 2.06         | -0.47    | -0.22        | -0.67        | -0.25    | 0.04         | -0.18        | -0.25        | 0.04         | -0.18        |
| MS                             | 1.11            | <b>31.28</b> | <b>33.01</b> | -0.47    | <b>29.59</b> | <b>29.26</b> | -0.25    | <b>29.93</b> | <b>29.88</b> | 4.41         | <b>32.84</b> | <b>38.99</b> |
| Unique Factor Correlation = .5 |                 |              |              |          |              |              |          |              |              |              |              |              |
| $\alpha(.7)$                   |                 |              |              |          |              |              |          |              |              |              |              |              |
| CS                             | 9.09            | 6.51         | <b>16.37</b> | -0.66    | -1.44        | -2.06        | 0.46     | 0.54         | 1.08         | 0.46         | 0.54         | 1.08         |
| MS                             | 9.09            | <b>39.01</b> | <b>52.09</b> | -0.66    | <b>28.25</b> | <b>27.76</b> | 0.46     | <b>30.30</b> | <b>31.30</b> | <b>11.27</b> | <b>38.37</b> | <b>54.43</b> |
| $\alpha(.8)$                   |                 |              |              |          |              |              |          |              |              |              |              |              |
| CS                             | 5.22            | 3.36         | 8.81         | -0.50    | -0.82        | -1.29        | 0.09     | 0.05         | 0.18         | 0.09         | 0.05         | 0.18         |
| MS                             | 5.22            | <b>35.13</b> | <b>42.50</b> | -0.50    | <b>29.13</b> | <b>28.79</b> | 0.09     | <b>30.06</b> | <b>30.49</b> | 7.89         | <b>35.45</b> | <b>46.51</b> |
| $\alpha(.9)$                   |                 |              |              |          |              |              |          |              |              |              |              |              |
| CS                             | 2.46            | 1.59         | 4.06         | -0.08    | -0.29        | -0.39        | 0.16     | 0.07         | 0.21         | 0.16         | 0.07         | 0.21         |
| MS                             | 2.46            | <b>32.33</b> | <b>35.79</b> | -0.08    | <b>29.65</b> | <b>29.76</b> | 0.16     | <b>30.02</b> | <b>30.45</b> | 4.31         | <b>32.61</b> | <b>38.56</b> |

Note: Hoshino-Bentler indicates Hoshino and Bentler's (2013) FSR method, Croon FM = Croon's method corrected for correlated uniquenesses at the factor model level, Croon MM = Croon's method corrected for correlated uniquenesses at the measurement model level, SEM = Structural Equation Modeling (Simultaneous Estimation) correctly specifying the correlated residual structure, CS = correct structural model specification ( $c'$  path freely estimated), MS = structural misspecification ( $c'$  path constrained to 0). Bold entries indicate absolute values of percent bias > 10.

**Table 5**

Percent Bias in Models Omitting the Unique Factor Correlations by Parameter and Simulation Condition, Simulation 1:  $N = 250$ , 2 Unique Factor Correlations.

| Path:                          | Regression FS |               |               | Bartlett FS   |               |               | Croon        |              |              | SEM          |              |               |
|--------------------------------|---------------|---------------|---------------|---------------|---------------|---------------|--------------|--------------|--------------|--------------|--------------|---------------|
|                                | <i>a</i>      | <i>b</i>      | <i>ab</i>     | <i>a</i>      | <i>b</i>      | <i>ab</i>     | <i>a</i>     | <i>b</i>     | <i>ab</i>    | <i>a</i>     | <i>b</i>     | <i>ab</i>     |
| Unique Factor Correlation = .1 |               |               |               |               |               |               |              |              |              |              |              |               |
| $\alpha(.7)$                   |               |               |               |               |               |               |              |              |              |              |              |               |
| CS                             | <b>-27.93</b> | <b>-26.68</b> | <b>-47.12</b> | <b>-27.35</b> | <b>-26.96</b> | <b>-46.97</b> | 2.72         | 1.88         | 4.76         | 4.34         | 3.54         | 8.18          |
| MS                             | <b>-27.93</b> | -6.94         | <b>-32.68</b> | <b>-27.35</b> | -7.32         | <b>-32.45</b> | 2.72         | <b>32.07</b> | <b>36.03</b> | <b>16.25</b> | <b>43.32</b> | <b>66.96</b>  |
| $\alpha(.8)$                   |               |               |               |               |               |               |              |              |              |              |              |               |
| CS                             | <b>-18.03</b> | <b>-17.89</b> | <b>-32.64</b> | <b>-18.01</b> | <b>-17.89</b> | <b>-32.65</b> | 2.03         | 1.11         | 3.25         | 2.79         | 1.99         | 4.93          |
| MS                             | <b>-18.03</b> | 5.71          | <b>-13.08</b> | <b>-18.01</b> | 5.70          | <b>-13.08</b> | 2.03         | <b>31.58</b> | <b>34.56</b> | <b>11.87</b> | <b>38.99</b> | <b>55.82</b>  |
| $\alpha(.9)$                   |               |               |               |               |               |               |              |              |              |              |              |               |
| CS                             | -9.16         | -9.08         | <b>-17.35</b> | -9.10         | -9.14         | <b>-17.36</b> | 0.87         | 0.65         | 1.58         | 1.15         | 0.96         | 2.18          |
| MS                             | -9.16         | <b>17.91</b>  | 7.37          | -9.10         | <b>17.83</b>  | 7.36          | 0.87         | <b>30.84</b> | <b>32.23</b> | 6.25         | <b>34.42</b> | <b>43.09</b>  |
| Unique Factor Correlation = .3 |               |               |               |               |               |               |              |              |              |              |              |               |
| $\alpha(.7)$                   |               |               |               |               |               |               |              |              |              |              |              |               |
| CS                             | <b>-22.45</b> | <b>-23.98</b> | <b>-40.99</b> | <b>-22.32</b> | <b>-24.12</b> | <b>-41.04</b> | <b>10.10</b> | 5.97         | <b>16.91</b> | <b>13.53</b> | 8.87         | <b>23.87</b>  |
| MS                             | <b>-22.45</b> | -1.91         | <b>-23.64</b> | <b>-22.32</b> | -2.09         | <b>-23.66</b> | <b>10.10</b> | <b>39.05</b> | <b>53.49</b> | <b>25.66</b> | <b>52.28</b> | <b>91.67</b>  |
| $\alpha(.8)$                   |               |               |               |               |               |               |              |              |              |              |              |               |
| CS                             | <b>-14.98</b> | <b>-15.71</b> | <b>-28.29</b> | <b>-15.02</b> | <b>-15.72</b> | <b>-28.38</b> | 5.93         | 4.16         | <b>10.39</b> | 7.35         | 5.52         | <b>13.34</b>  |
| MS                             | <b>-14.98</b> | 9.29          | -6.82         | <b>-15.02</b> | <b>9.27</b>   | -6.92         | 5.93         | <b>36.15</b> | <b>44.51</b> | <b>16.84</b> | <b>44.42</b> | <b>69.06</b>  |
| $\alpha(.9)$                   |               |               |               |               |               |               |              |              |              |              |              |               |
| CS                             | -7.51         | -8.42         | -15.3         | -7.46         | -8.41         | -15.28        | 2.65         | 1.42         | 4.07         | 3.05         | 1.83         | 4.90          |
| MS                             | -7.51         | 19.38         | 10.62         | -7.46         | 19.37         | 10.65         | 2.65         | 32.48        | 36.18        | 8.28         | 36.28        | 47.77         |
| Unique Factor Correlation = .5 |               |               |               |               |               |               |              |              |              |              |              |               |
| $\alpha(.7)$                   |               |               |               |               |               |               |              |              |              |              |              |               |
| CS                             | <b>-16.96</b> | <b>-20.15</b> | <b>-33.65</b> | <b>-16.84</b> | <b>-19.99</b> | <b>-33.47</b> | <b>17.70</b> | <b>13.47</b> | <b>33.87</b> | <b>25.21</b> | <b>19.86</b> | <b>50.43</b>  |
| MS                             | <b>-16.96</b> | 4.14          | <b>-13.24</b> | <b>-16.84</b> | 4.32          | <b>-12.98</b> | <b>17.70</b> | <b>47.93</b> | <b>74.48</b> | <b>36.28</b> | <b>63.87</b> | <b>123.47</b> |
| $\alpha(.8)$                   |               |               |               |               |               |               |              |              |              |              |              |               |
| CS                             | <b>-11.31</b> | <b>-13.80</b> | <b>-23.50</b> | <b>-11.38</b> | <b>-13.76</b> | <b>-23.56</b> | <b>10.51</b> | <b>7.11</b>  | <b>18.43</b> | <b>13.37</b> | 9.63         | <b>24.37</b>  |
| MS                             | <b>-11.31</b> | <b>12.66</b>  | 0.20          | <b>-11.38</b> | <b>12.70</b>  | 0.14          | <b>10.51</b> | <b>40.46</b> | <b>55.49</b> | <b>23.08</b> | <b>50.37</b> | <b>85.34</b>  |
| $\alpha(.9)$                   |               |               |               |               |               |               |              |              |              |              |              |               |
| CS                             | -5.75         | -6.86         | -12.18        | -5.79         | -6.84         | <b>-12.22</b> | 4.59         | 3.32         | 8.09         | 5.28         | 4.00         | 9.53          |
| MS                             | -5.75         | <b>21.35</b>  | <b>14.60</b>  | -5.79         | <b>21.37</b>  | <b>14.56</b>  | 4.59         | <b>34.69</b> | <b>41.09</b> | <b>10.62</b> | <b>38.83</b> | <b>53.82</b>  |

Note: Regression FS = regression FSR method, Bartlett FS = Bartlett FSR method, Croon = Croon's method using the original formulas uncorrected for unique factor correlations, SEM = Structural Equation Modeling (Simultaneous Estimation) under the assumption of conditionally independent uniquenesses, CS = correct structural model specification ( $c'$  path freely estimated), MS = structural misspecification ( $c'$  path constrained to 0). Bold entries indicate absolute values of percent bias > 10.

**Table 6**

Percent Bias in Models Correctly Specifying the Unique Factor Structure by Parameter and Simulation Condition,  
Simulation 1:  $N = 250$ , 2 Unique Factor Correlations.

| Path:                          | Hoshino-Bentler |              |              | Croon FM |              |              | Croon MM |              |              | SEM          |              |              |
|--------------------------------|-----------------|--------------|--------------|----------|--------------|--------------|----------|--------------|--------------|--------------|--------------|--------------|
|                                | <i>a</i>        | <i>b</i>     | <i>ab</i>    | <i>a</i> | <i>b</i>     | <i>ab</i>    | <i>a</i> | <i>b</i>     | <i>ab</i>    | <i>a</i>     | <i>b</i>     | <i>ab</i>    |
| Unique Factor Correlation = .1 |                 |              |              |          |              |              |          |              |              |              |              |              |
| $\alpha(.7)$                   |                 |              |              |          |              |              |          |              |              |              |              |              |
| CS                             | 3.78            | 3.11         | 7.12         | -1.02    | -0.88        | -1.81        | 0.22     | 0.74         | 1.05         | 0.22         | 0.74         | 1.05         |
| MS                             | 3.78            | <b>33.61</b> | <b>39.02</b> | -1.02    | <b>28.18</b> | <b>27.25</b> | 0.22     | <b>30.10</b> | <b>30.76</b> | <b>12.06</b> | <b>39.19</b> | <b>56.38</b> |
| $\alpha(.8)$                   |                 |              |              |          |              |              |          |              |              |              |              |              |
| CS                             | 2.55            | 1.82         | 4.53         | -0.17    | -0.49        | -0.58        | 0.46     | 0.38         | 0.92         | 0.46         | 0.38         | 0.92         |
| MS                             | 2.55            | <b>32.37</b> | <b>36.07</b> | -0.17    | <b>29.28</b> | <b>29.37</b> | 0.46     | <b>30.24</b> | <b>31.15</b> | 9.37         | <b>36.53</b> | <b>49.67</b> |
| $\alpha(.9)$                   |                 |              |              |          |              |              |          |              |              |              |              |              |
| CS                             | 1.07            | 0.90         | 2.04         | -0.12    | -0.05        | -0.10        | 0.12     | 0.26         | 0.44         | 0.12         | 0.26         | 0.44         |
| MS                             | 1.07            | <b>31.14</b> | <b>32.80</b> | -0.12    | <b>29.80</b> | <b>29.91</b> | 0.12     | <b>30.17</b> | <b>30.58</b> | 5.07         | <b>33.29</b> | <b>40.33</b> |
| Unique Factor Correlation = .3 |                 |              |              |          |              |              |          |              |              |              |              |              |
| $\alpha(.7)$                   |                 |              |              |          |              |              |          |              |              |              |              |              |
| CS                             | <b>10.04</b>    | 6.04         | <b>16.90</b> | -1.25    | -2.33        | -3.45        | -0.30    | -0.83        | -1.00        | -0.3         | -0.83        | -1.00        |
| MS                             | <b>10.04</b>    | <b>39.29</b> | <b>53.68</b> | -1.25    | <b>27.35</b> | <b>26.16</b> | -0.30    | <b>29.09</b> | <b>29.13</b> | <b>10.81</b> | <b>37.45</b> | <b>52.79</b> |
| $\alpha(.8)$                   |                 |              |              |          |              |              |          |              |              |              |              |              |
| CS                             | 5.88            | 4.43         | <b>10.64</b> | -0.74    | -0.38        | -1.08        | -0.21    | 0.44         | 0.27         | -0.21        | 0.44         | 0.27         |
| MS                             | 5.88            | <b>36.29</b> | <b>44.60</b> | -0.74    | <b>29.41</b> | <b>28.76</b> | -0.21    | <b>30.26</b> | <b>30.30</b> | 7.88         | <b>35.82</b> | <b>46.89</b> |
| $\alpha(.9)$                   |                 |              |              |          |              |              |          |              |              |              |              |              |
| CS                             | 2.58            | 1.53         | 4.11         | -0.29    | -0.61        | -0.93        | -0.11    | -0.27        | -0.41        | -0.11        | -0.27        | -0.41        |
| MS                             | 2.58            | <b>32.52</b> | <b>36.12</b> | -0.29    | <b>29.44</b> | <b>29.27</b> | -0.11    | <b>29.77</b> | <b>29.84</b> | 4.19         | <b>32.46</b> | <b>38.23</b> |
| Unique Factor Correlation = .5 |                 |              |              |          |              |              |          |              |              |              |              |              |
| $\alpha(.7)$                   |                 |              |              |          |              |              |          |              |              |              |              |              |
| CS                             | <b>16.41</b>    | <b>12.47</b> | <b>31.14</b> | -1.02    | -0.87        | -1.83        | -0.36    | 0.54         | 0.26         | -0.36        | 0.54         | 0.26         |
| MS                             | <b>16.41</b>    | <b>46.94</b> | <b>71.43</b> | -1.02    | <b>28.63</b> | <b>27.71</b> | -0.36    | <b>30.13</b> | <b>30.09</b> | 9.11         | <b>37.06</b> | <b>50.05</b> |
| $\alpha(.8)$                   |                 |              |              |          |              |              |          |              |              |              |              |              |
| CS                             | 9.75            | 6.73         | <b>17.22</b> | -0.56    | -0.64        | -1.16        | -0.20    | 0.00         | -0.13        | -0.2         | 0.00         | -0.13        |
| MS                             | 9.75            | <b>39.82</b> | <b>53.76</b> | -0.56    | <b>29.17</b> | <b>28.78</b> | -0.20    | <b>29.85</b> | <b>29.94</b> | 6.48         | <b>34.37</b> | <b>43.50</b> |
| $\alpha(.9)$                   |                 |              |              |          |              |              |          |              |              |              |              |              |
| CS                             | 4.27            | 3.23         | 7.68         | -0.41    | -0.04        | -0.42        | -0.23    | 0.31         | 0.12         | -0.23        | 0.31         | 0.12         |
| MS                             | 4.27            | <b>34.42</b> | <b>40.40</b> | -0.41    | <b>29.66</b> | <b>29.37</b> | -0.23    | <b>29.97</b> | <b>29.93</b> | 3.12         | <b>31.99</b> | <b>36.39</b> |

Note: Hoshino-Bentler indicates Hoshino and Bentler's (2013) FSR method, Croon FM = Croon's method corrected for correlated uniquenesses at the factor model level, Croon MM = Croon's method corrected for correlated uniquenesses at the measurement model level, SEM = Structural Equation Modeling (Simultaneous Estimation) correctly specifying the correlated residual structure, CS = correct structural model specification ( $c'$  path freely estimated), MS = structural misspecification ( $c'$  path constrained to 0). Bold entries indicate absolute values of percent bias > 10.

**Table 7**

Percent Bias in Models Omitting the Unique Factor Correlations by Parameter and Simulation Condition, Simulation 1:  
*N* = 500, 1 Unique Factor Correlation.

| Path:                          | Regression FS |               |               | Bartlett FS   |               |               | Croon    |              |              | SEM          |              |               |
|--------------------------------|---------------|---------------|---------------|---------------|---------------|---------------|----------|--------------|--------------|--------------|--------------|---------------|
|                                | <i>a</i>      | <i>b</i>      | <i>ab</i>     | <i>a</i>      | <i>b</i>      | <i>ab</i>     | <i>a</i> | <i>b</i>     | <i>ab</i>    | <i>a</i>     | <i>b</i>     | <i>ab</i>     |
| Unique Factor Correlation = .1 |               |               |               |               |               |               |          |              |              |              |              |               |
| $\alpha(.7)$                   |               |               |               |               |               |               |          |              |              |              |              |               |
| CS                             | <b>-29.11</b> | <b>-27.42</b> | <b>-48.54</b> | <b>-29.21</b> | <b>-27.36</b> | <b>-48.58</b> | 0.92     | 0.32         | 1.28         | 1.82         | 1.22         | 3.09          |
| MS                             | <b>-29.11</b> | -8.19         | <b>-34.78</b> | <b>-29.21</b> | -8.11         | <b>-34.82</b> | 0.92     | <b>30.84</b> | <b>32.24</b> | <b>13.85</b> | <b>41.03</b> | <b>60.78</b>  |
| $\alpha(.8)$                   |               |               |               |               |               |               |          |              |              |              |              |               |
| CS                             | <b>-19.23</b> | <b>-18.62</b> | <b>-34.26</b> | <b>-19.22</b> | <b>-18.65</b> | <b>-34.30</b> | 0.83     | 0.18         | 1.03         | 1.26         | 0.61         | 1.89          |
| MS                             | <b>-19.23</b> | 4.57          | <b>-15.41</b> | <b>-19.22</b> | 4.53          | <b>-15.46</b> | 0.83     | <b>30.50</b> | <b>31.72</b> | <b>10.30</b> | <b>37.36</b> | <b>51.66</b>  |
| $\alpha(.9)$                   |               |               |               |               |               |               |          |              |              |              |              |               |
| CS                             | -9.69         | -9.81         | <b>-18.56</b> | -9.73         | -9.78         | <b>-18.57</b> | 0.26     | -0.25        | 0.01         | 0.41         | -0.10        | 0.30          |
| MS                             | -9.69         | <b>17.11</b>  | 5.88          | -9.73         | <b>17.15</b>  | 5.86          | 0.26     | <b>30.06</b> | <b>30.51</b> | 5.44         | <b>33.41</b> | <b>40.79</b>  |
| Unique Factor Correlation = .3 |               |               |               |               |               |               |          |              |              |              |              |               |
| $\alpha(.7)$                   |               |               |               |               |               |               |          |              |              |              |              |               |
| CS                             | <b>-26.09</b> | <b>-25.41</b> | <b>-44.85</b> | <b>-25.94</b> | <b>-25.45</b> | <b>-44.79</b> | 5.25     | 3.87         | 9.43         | 7.61         | 5.83         | <b>14.00</b>  |
| MS                             | <b>-26.09</b> | -5.02         | <b>-29.67</b> | <b>-25.94</b> | -5.08         | <b>-29.57</b> | 5.25     | <b>35.20</b> | <b>42.51</b> | <b>19.61</b> | <b>46.92</b> | <b>75.92</b>  |
| $\alpha(.8)$                   |               |               |               |               |               |               |          |              |              |              |              |               |
| CS                             | <b>-17.51</b> | <b>-17.01</b> | <b>-31.52</b> | <b>-17.52</b> | <b>-17.06</b> | <b>-31.60</b> | 2.88     | 2.33         | 5.29         | 3.80         | 3.12         | 7.04          |
| MS                             | <b>-17.51</b> | 6.77          | <b>-11.79</b> | <b>-17.52</b> | 6.70          | <b>-11.88</b> | 2.88     | <b>33.07</b> | <b>37.03</b> | <b>12.96</b> | <b>40.48</b> | <b>58.83</b>  |
| $\alpha(.9)$                   |               |               |               |               |               |               |          |              |              |              |              |               |
| CS                             | -8.44         | -9.06         | <b>-16.74</b> | -8.47         | -9.02         | <b>-16.74</b> | 1.63     | 0.68         | 2.31         | 1.88         | 0.93         | 2.81          |
| MS                             | -8.44         | <b>18.15</b>  | 8.30          | -8.47         | <b>18.20</b>  | 8.30          | 1.63     | <b>31.21</b> | <b>33.46</b> | 6.94         | <b>34.71</b> | <b>44.17</b>  |
| Unique Factor Correlation = .5 |               |               |               |               |               |               |          |              |              |              |              |               |
| $\alpha(.7)$                   |               |               |               |               |               |               |          |              |              |              |              |               |
| CS                             | <b>-23.03</b> | <b>-24.14</b> | <b>-41.59</b> | <b>-23.05</b> | <b>-24.22</b> | <b>-41.71</b> | 9.70     | 5.99         | <b>16.32</b> | <b>17.24</b> | <b>11.45</b> | <b>30.75</b>  |
| MS                             | <b>-23.03</b> | -2.54         | <b>-24.82</b> | <b>-23.05</b> | -2.67         | <b>-24.97</b> | 9.70     | <b>38.73</b> | <b>52.40</b> | <b>28.81</b> | <b>55.11</b> | <b>100.01</b> |
| $\alpha(.8)$                   |               |               |               |               |               |               |          |              |              |              |              |               |
| CS                             | <b>-15.74</b> | <b>-16.26</b> | <b>-29.44</b> | <b>-15.66</b> | <b>-16.31</b> | <b>-29.43</b> | 5.19     | 3.58         | 8.95         | 7.41         | 5.51         | <b>13.33</b>  |
| MS                             | <b>-15.74</b> | 8.31          | -8.60         | <b>-15.66</b> | 8.24          | -8.58         | 5.19     | <b>35.14</b> | <b>42.29</b> | <b>16.80</b> | <b>44.23</b> | <b>68.61</b>  |
| $\alpha(.9)$                   |               |               |               |               |               |               |          |              |              |              |              |               |
| CS                             | -7.47         | -8.43         | <b>-15.26</b> | -7.50         | -8.40         | <b>-15.26</b> | 2.72     | 1.46         | 4.24         | 3.17         | 1.89         | 5.13          |
| MS                             | -7.47         | <b>19.14</b>  | 10.36         | -7.50         | <b>19.17</b>  | <b>10.36</b>  | 2.72     | <b>32.31</b> | <b>36.02</b> | 8.31         | <b>36.08</b> | <b>47.51</b>  |

Note: Regression FS = regression FSR method, Bartlett FS = Bartlett FSR method, Croon = Croon's method using the original formulas uncorrected for unique factor correlations, SEM = Structural Equation Modeling (Simultaneous Estimation) under the assumption of conditionally independent uniquenesses, CS = correct structural model specification (*c'* path freely estimated), MS = structural misspecification (*c'* path constrained to 0). Bold entries indicate absolute values of percent bias > 10.

**Table 8**

Percent Bias in Models Correctly Specifying the Unique Factor Structure by Parameter and Simulation Condition,  
Simulation 1:  $N = 500$ , 1 Unique Factor Correlation.

| Path:                          | Hoshino-Bentler |              |              | Croon FM |              |              | Croon MM |              |              | SEM          |              |              |
|--------------------------------|-----------------|--------------|--------------|----------|--------------|--------------|----------|--------------|--------------|--------------|--------------|--------------|
|                                | <i>a</i>        | <i>b</i>     | <i>ab</i>    | <i>a</i> | <i>b</i>     | <i>ab</i>    | <i>a</i> | <i>b</i>     | <i>ab</i>    | <i>a</i>     | <i>b</i>     | <i>ab</i>    |
| Unique Factor Correlation = .1 |                 |              |              |          |              |              |          |              |              |              |              |              |
| $\alpha(.7)$                   |                 |              |              |          |              |              |          |              |              |              |              |              |
| CS                             | 1.52            | 0.99         | 2.55         | -1.00    | -0.95        | -1.92        | -0.29    | -0.19        | -0.46        | -0.29        | -0.19        | -0.46        |
| MS                             | 1.52            | <b>31.61</b> | <b>33.80</b> | -1.00    | <b>28.91</b> | <b>27.81</b> | -0.29    | <b>29.82</b> | <b>29.64</b> | <b>11.68</b> | <b>38.87</b> | <b>55.32</b> |
| $\alpha(.8)$                   |                 |              |              |          |              |              |          |              |              |              |              |              |
| CS                             | 1.12            | 0.51         | 1.65         | -0.35    | -0.54        | -0.87        | 0.00     | -0.14        | -0.13        | 0.00         | -0.14        | -0.13        |
| MS                             | 1.12            | 30.9         | 32.5         | -0.35    | 29.38        | 29.07        | 0.00     | 29.86        | 30.00        | 8.98         | <b>36.15</b> | <b>48.54</b> |
| $\alpha(.9)$                   |                 |              |              |          |              |              |          |              |              |              |              |              |
| CS                             | 0.36            | -0.14        | 0.22         | -0.25    | -0.58        | -0.83        | -0.12    | -0.45        | -0.57        | -0.12        | -0.45        | -0.57        |
| MS                             | 0.36            | <b>30.20</b> | <b>30.79</b> | -0.25    | <b>29.55</b> | <b>29.35</b> | -0.12    | <b>29.73</b> | <b>29.69</b> | 4.84         | <b>32.86</b> | <b>39.42</b> |
| Unique Factor Correlation = .3 |                 |              |              |          |              |              |          |              |              |              |              |              |
| $\alpha(.7)$                   |                 |              |              |          |              |              |          |              |              |              |              |              |
| CS                             | 5.19            | 4.03         | 9.54         | -0.53    | -0.25        | -0.72        | 0.06     | 0.57         | 0.71         | 0.06         | 0.57         | 0.71         |
| MS                             | 5.19            | <b>35.30</b> | <b>42.54</b> | -0.53    | <b>29.23</b> | <b>28.74</b> | 0.06     | <b>30.12</b> | <b>30.41</b> | <b>11.45</b> | <b>38.68</b> | <b>54.79</b> |
| $\alpha(.8)$                   |                 |              |              |          |              |              |          |              |              |              |              |              |
| CS                             | 2.88            | 2.38         | 5.35         | -0.48    | 0.06         | -0.43        | -0.13    | 0.41         | 0.29         | -0.13        | 0.41         | 0.29         |
| MS                             | 2.88            | <b>33.10</b> | <b>37.07</b> | -0.48    | <b>29.69</b> | <b>29.19</b> | -0.13    | <b>30.12</b> | <b>30.09</b> | <b>8.34</b>  | <b>35.99</b> | <b>47.49</b> |
| $\alpha(.9)$                   |                 |              |              |          |              |              |          |              |              |              |              |              |
| CS                             | 1.59            | 0.70         | 2.30         | 0.13     | -0.31        | -0.19        | 0.25     | -0.17        | 0.07         | 0.25         | -0.17        | 0.07         |
| MS                             | 1.59            | <b>31.23</b> | <b>33.43</b> | 0.13     | <b>29.69</b> | <b>29.98</b> | 0.25     | <b>29.88</b> | <b>30.32</b> | 4.85         | <b>32.78</b> | <b>39.34</b> |
| Unique Factor Correlation = .5 |                 |              |              |          |              |              |          |              |              |              |              |              |
| $\alpha(.7)$                   |                 |              |              |          |              |              |          |              |              |              |              |              |
| CS                             | 9.35            | 6.11         | <b>16.09</b> | 0.00     | -0.85        | -0.86        | 0.51     | 0.19         | 0.71         | 0.51         | 0.19         | 0.71         |
| MS                             | 9.35            | <b>38.71</b> | <b>51.91</b> | 0.00     | <b>28.87</b> | <b>29.06</b> | 0.51     | <b>29.91</b> | <b>30.78</b> | <b>11.17</b> | <b>37.88</b> | <b>53.54</b> |
| $\alpha(.8)$                   |                 |              |              |          |              |              |          |              |              |              |              |              |
| CS                             | 5.01            | 3.62         | 8.82         | -0.47    | -0.25        | -0.72        | -0.20    | 0.18         | -0.02        | -0.20        | 0.18         | -0.02        |
| MS                             | 5.01            | <b>35.11</b> | <b>42.03</b> | -0.47    | <b>29.45</b> | <b>28.99</b> | -0.20    | <b>29.94</b> | <b>29.83</b> | 7.62         | <b>35.32</b> | <b>45.80</b> |
| $\alpha(.9)$                   |                 |              |              |          |              |              |          |              |              |              |              |              |
| CS                             | 2.65            | 1.45         | 4.16         | 0.22     | -0.19        | 0.05         | 0.35     | -0.04        | 0.33         | 0.35         | -0.04        | 0.33         |
| MS                             | 2.65            | <b>32.24</b> | <b>35.87</b> | 0.22     | <b>29.79</b> | <b>30.19</b> | 0.35     | <b>29.94</b> | <b>30.52</b> | 4.46         | <b>32.51</b> | <b>38.55</b> |

Note: Hoshino-Bentler indicates Hoshino and Bentler's (2013) FSR method, Croon FM = Croon's method corrected for correlated uniquenesses at the factor model level, Croon MM = Croon's method corrected for correlated uniquenesses at the measurement model level, SEM = Structural Equation Modeling (Simultaneous Estimation) correctly specifying the correlated residual structure, CS = correct structural model specification ( $c'$  path freely estimated), MS = structural misspecification ( $c'$  path constrained to 0). Bold entries indicate absolute values of percent bias > 10.



**Table 9**

Percent Bias in Models Omitting the Unique Factor Correlations by Parameter and Simulation Condition, Simulation 1:  
 $N = 500$ , 2 Unique Factor Correlations.

| Path:                          | Regression FS |               |               | Bartlett FS   |               |               | Croon        |              |              | SEM          |              |               |
|--------------------------------|---------------|---------------|---------------|---------------|---------------|---------------|--------------|--------------|--------------|--------------|--------------|---------------|
|                                | <i>a</i>      | <i>b</i>      | <i>ab</i>     | <i>a</i>      | <i>b</i>      | <i>ab</i>     | <i>a</i>     | <i>b</i>     | <i>ab</i>    | <i>a</i>     | <i>b</i>     | <i>ab</i>     |
| Unique Factor Correlation = .1 |               |               |               |               |               |               |              |              |              |              |              |               |
| $\alpha(.7)$                   |               |               |               |               |               |               |              |              |              |              |              |               |
| CS                             | <b>-27.47</b> | <b>-26.41</b> | <b>-46.61</b> | <b>-27.42</b> | <b>-26.47</b> | <b>-46.64</b> | 3.26         | 2.04         | 5.43         | 4.13         | 2.91         | 7.21          |
| MS                             | <b>-27.47</b> | -6.62         | <b>-32.14</b> | <b>-27.42</b> | -6.70         | <b>-32.16</b> | 3.26         | <b>32.86</b> | <b>37.38</b> | <b>16.08</b> | <b>43.06</b> | <b>66.23</b>  |
| $\alpha(.8)$                   |               |               |               |               |               |               |              |              |              |              |              |               |
| CS                             | <b>-18.36</b> | <b>-18.03</b> | <b>-33.08</b> | <b>-18.39</b> | <b>-17.94</b> | <b>-33.05</b> | 1.83         | 1.09         | 2.94         | 2.26         | 1.54         | 3.84          |
| MS                             | <b>-18.36</b> | 5.44          | <b>-13.81</b> | <b>-18.39</b> | 5.56          | <b>-13.75</b> | 1.83         | <b>31.68</b> | <b>34.21</b> | <b>11.32</b> | <b>38.56</b> | <b>54.38</b>  |
| $\alpha(.9)$                   |               |               |               |               |               |               |              |              |              |              |              |               |
| CS                             | -9.36         | -9.26         | <b>-17.74</b> | -9.35         | -9.29         | <b>-17.78</b> | 0.68         | 0.41         | 1.10         | 0.84         | 0.56         | 1.40          |
| MS                             | -9.36         | <b>17.73</b>  | 6.84          | -9.35         | <b>17.68</b>  | 6.80          | 0.68         | <b>30.71</b> | <b>31.73</b> | 5.92         | <b>34.08</b> | <b>42.15</b>  |
| Unique Factor Correlation = .3 |               |               |               |               |               |               |              |              |              |              |              |               |
| $\alpha(.7)$                   |               |               |               |               |               |               |              |              |              |              |              |               |
| CS                             | <b>-21.96</b> | <b>-23.02</b> | <b>-39.93</b> | <b>-22.14</b> | <b>-22.89</b> | <b>-40.00</b> | <b>10.91</b> | 7.64         | <b>19.43</b> | <b>13.50</b> | 9.92         | <b>24.84</b>  |
| MS                             | <b>-21.96</b> | -0.90         | <b>-22.54</b> | <b>-22.14</b> | -0.76         | <b>-22.61</b> | <b>10.91</b> | <b>41.04</b> | <b>56.62</b> | <b>25.55</b> | <b>53.08</b> | <b>92.38</b>  |
| $\alpha(.8)$                   |               |               |               |               |               |               |              |              |              |              |              |               |
| CS                             | <b>-14.62</b> | <b>-16.07</b> | <b>-28.33</b> | <b>-14.55</b> | <b>-16.13</b> | <b>-28.34</b> | 6.64         | 3.85         | <b>10.75</b> | 7.68         | 4.82         | <b>12.87</b>  |
| MS                             | <b>-14.62</b> | 9.09          | -6.73         | <b>-14.55</b> | 9.01          | -6.74         | 6.64         | <b>36.17</b> | <b>45.34</b> | <b>17.14</b> | <b>44.02</b> | <b>68.84</b>  |
| $\alpha(.9)$                   |               |               |               |               |               |               |              |              |              |              |              |               |
| CS                             | -7.55         | -7.86         | <b>-14.78</b> | -7.51         | -7.90         | <b>-14.80</b> | 2.68         | 2.13         | 4.89         | 2.95         | 2.39         | 5.43          |
| MS                             | -7.55         | <b>19.67</b>  | <b>10.77</b>  | -7.51         | <b>19.61</b>  | <b>10.75</b>  | 2.68         | <b>32.85</b> | <b>36.54</b> | 8.14         | <b>36.41</b> | <b>47.64</b>  |
| Unique Factor Correlation = .5 |               |               |               |               |               |               |              |              |              |              |              |               |
| $\alpha(.7)$                   |               |               |               |               |               |               |              |              |              |              |              |               |
| CS                             | <b>-17.15</b> | <b>-20.38</b> | <b>-34.01</b> | <b>-17.11</b> | <b>-20.31</b> | <b>-33.94</b> | <b>18.11</b> | <b>13.00</b> | <b>33.58</b> | <b>24.93</b> | <b>18.77</b> | <b>48.50</b>  |
| MS                             | <b>-17.15</b> | 3.96          | <b>-13.72</b> | <b>-17.11</b> | 4.05          | <b>-13.60</b> | <b>18.11</b> | <b>48.36</b> | <b>75.43</b> | <b>36.25</b> | <b>63.88</b> | <b>123.38</b> |
| $\alpha(.8)$                   |               |               |               |               |               |               |              |              |              |              |              |               |
| CS                             | <b>-10.99</b> | <b>-13.60</b> | <b>-23.10</b> | <b>-11.09</b> | <b>-13.53</b> | <b>-23.15</b> | <b>10.96</b> | 7.39         | <b>19.15</b> | <b>13.36</b> | 9.50         | <b>24.13</b>  |
| MS                             | <b>-10.99</b> | <b>12.94</b>  | 0.65          | <b>-11.09</b> | <b>13.02</b>  | 0.59          | <b>10.96</b> | <b>40.91</b> | <b>56.47</b> | <b>23.02</b> | <b>50.28</b> | <b>84.99</b>  |
| $\alpha(.9)$                   |               |               |               |               |               |               |              |              |              |              |              |               |
| CS                             | -5.50         | -7.34         | <b>-12.45</b> | -5.48         | -7.33         | <b>-12.42</b> | 4.92         | 2.74         | 7.77         | 5.45         | 3.25         | 8.86          |
| MS                             | -5.50         | <b>21.30</b>  | <b>14.73</b>  | -5.48         | <b>21.32</b>  | <b>14.76</b>  | 4.92         | <b>34.70</b> | <b>41.42</b> | <b>10.83</b> | 38.70        | <b>53.82</b>  |

Note: Regression FS = regression FSR method, Bartlett FS = Bartlett FSR method, Croon = Croon's method using the original formulas uncorrected for unique factor correlations, SEM = Structural Equation Modeling (Simultaneous Estimation) under the assumption of conditionally independent uniquenesses, CS = correct structural model specification ( $c'$  path freely estimated), MS = structural misspecification ( $c'$  path constrained to 0). Bold entries indicate absolute values of percent bias > 10.

**Table 10**

Percent Bias in Models Correctly Specifying the Unique Factor Structure by Parameter and Simulation Condition,  
Simulation 1:  $N = 500$ , 2 Unique Factor Correlations.

| Path:                          | Hoshino-Bentler |              |              | Croon FM |              |              | Croon MM |              |              | SEM          |              |              |
|--------------------------------|-----------------|--------------|--------------|----------|--------------|--------------|----------|--------------|--------------|--------------|--------------|--------------|
|                                | <i>a</i>        | <i>b</i>     | <i>ab</i>    | <i>a</i> | <i>b</i>     | <i>ab</i>    | <i>a</i> | <i>b</i>     | <i>ab</i>    | <i>a</i>     | <i>b</i>     | <i>ab</i>    |
| Unique Factor Correlation = .1 |                 |              |              |          |              |              |          |              |              |              |              |              |
| $\alpha(.7)$                   |                 |              |              |          |              |              |          |              |              |              |              |              |
| CS                             | 3.68            | 2.58         | 6.41         | -0.53    | -0.59        | -1.09        | 0.07     | 0.16         | 0.25         | 0.07         | 0.16         | 0.25         |
| MS                             | 3.68            | <b>33.51</b> | <b>38.61</b> | -0.53    | <b>28.98</b> | <b>28.48</b> | 0.07     | <b>29.89</b> | <b>30.15</b> | 11.93        | <b>38.90</b> | <b>55.66</b> |
| $\alpha(.8)$                   |                 |              |              |          |              |              |          |              |              |              |              |              |
| CS                             | 2.06            | 1.39         | 3.48         | -0.40    | -0.37        | -0.78        | -0.08    | 0.03         | -0.07        | -0.08        | 0.03         | -0.07        |
| MS                             | 2.06            | <b>32.02</b> | <b>34.86</b> | -0.40    | <b>29.44</b> | <b>29.04</b> | -0.08    | <b>29.90</b> | <b>29.92</b> | 8.83         | <b>36.18</b> | <b>48.35</b> |
| $\alpha(.9)$                   |                 |              |              |          |              |              |          |              |              |              |              |              |
| CS                             | 0.77            | 0.49         | 1.26         | -0.30    | -0.27        | -0.57        | -0.18    | -0.16        | -0.33        | -0.18        | -0.16        | -0.33        |
| MS                             | 0.77            | <b>30.82</b> | <b>31.95</b> | -0.30    | <b>29.69</b> | <b>29.43</b> | -0.18    | <b>29.85</b> | <b>29.74</b> | 4.76         | <b>32.97</b> | <b>39.42</b> |
| Unique Factor Correlation = .3 |                 |              |              |          |              |              |          |              |              |              |              |              |
| $\alpha(.7)$                   |                 |              |              |          |              |              |          |              |              |              |              |              |
| CS                             | <b>10.33</b>    | 7.53         | <b>18.69</b> | -0.51    | -0.21        | -0.74        | -0.03    | 0.56         | 0.53         | -0.03        | 0.56         | 0.53         |
| MS                             | <b>10.33</b>    | <b>40.71</b> | <b>55.44</b> | -0.51    | <b>29.54</b> | <b>29.05</b> | -0.03    | <b>30.38</b> | <b>30.52</b> | <b>11.01</b> | <b>38.57</b> | <b>54.07</b> |
| $\alpha(.8)$                   |                 |              |              |          |              |              |          |              |              |              |              |              |
| CS                             | 6.28            | 3.87         | <b>10.40</b> | -0.10    | -0.71        | -0.82        | 0.15     | -0.21        | -0.06        | 0.15         | -0.21        | -0.06        |
| MS                             | 6.28            | <b>35.99</b> | <b>44.66</b> | -0.10    | <b>29.34</b> | <b>29.36</b> | 0.15     | <b>29.84</b> | <b>30.18</b> | 8.22         | <b>35.44</b> | <b>46.75</b> |
| $\alpha(.9)$                   |                 |              |              |          |              |              |          |              |              |              |              |              |
| CS                             | 2.48            | 2.05         | 4.60         | -0.34    | 0.10         | -0.22        | -0.29    | 0.25         | -0.02        | -0.29        | 0.25         | -0.02        |
| MS                             | 2.48            | <b>32.73</b> | <b>36.14</b> | -0.34    | <b>29.82</b> | <b>29.50</b> | -0.29    | <b>30.00</b> | 29.75        | 3.97         | <b>32.63</b> | <b>38.04</b> |
| Unique Factor Correlation = .5 |                 |              |              |          |              |              |          |              |              |              |              |              |
| $\alpha(.7)$                   |                 |              |              |          |              |              |          |              |              |              |              |              |
| CS                             | <b>16.44</b>    | <b>11.74</b> | <b>30.21</b> | -1.20    | -0.88        | -2.03        | -0.77    | -0.20        | -0.93        | -0.77        | -0.20        | -0.93        |
| MS                             | <b>16.44</b>    | <b>46.70</b> | <b>71.03</b> | -1.20    | <b>28.81</b> | <b>27.49</b> | -0.77    | <b>29.52</b> | <b>28.75</b> | 8.80         | <b>36.50</b> | <b>48.78</b> |
| $\alpha(.8)$                   |                 |              |              |          |              |              |          |              |              |              |              |              |
| CS                             | <b>10.03</b>    | 6.87         | <b>17.59</b> | -0.25    | -0.32        | -0.59        | 0.02     | 0.15         | 0.16         | 0.02         | 0.15         | 0.16         |
| MS                             | <b>10.03</b>    | <b>40.02</b> | <b>54.20</b> | -0.25    | <b>29.63</b> | <b>29.45</b> | 0.02     | <b>30.06</b> | <b>30.23</b> | 6.64         | <b>34.54</b> | <b>43.65</b> |
| $\alpha(.9)$                   |                 |              |              |          |              |              |          |              |              |              |              |              |
| CS                             | 4.44            | 2.55         | 7.09         | -0.09    | -0.60        | -0.71        | -0.03    | -0.38        | -0.43        | -0.03        | -0.38        | -0.43        |
| MS                             | 4.44            | <b>34.31</b> | <b>40.37</b> | -0.09    | <b>29.65</b> | <b>29.64</b> | -0.03    | <b>29.82</b> | <b>29.89</b> | 3.35         | <b>31.89</b> | <b>36.43</b> |

Note: Hoshino-Bentler indicates Hoshino and Bentler's (2013) FSR method, Croon FM = Croon's method corrected for correlated uniquenesses at the factor model level, Croon MM = Croon's method corrected for correlated uniquenesses at the measurement model level, SEM = Structural Equation Modeling (Simultaneous Estimation) correctly specifying the correlated residual structure, CS = correct structural model specification ( $c'$  path freely estimated), MS = structural misspecification ( $c'$  path constrained to 0). Bold entries indicate absolute values of percent bias > 10.

**Table 11**

Percent Bias in Models Omitting the Unique Factor Correlations by Parameter and Simulation Condition, Simulation 1:  
 $N = 1000$ , 1 Unique Factor Correlation.

| Path:                          | Regression FS |               |               | Bartlett FS   |               |               | Croon    |              |              | SEM          |              |              |
|--------------------------------|---------------|---------------|---------------|---------------|---------------|---------------|----------|--------------|--------------|--------------|--------------|--------------|
|                                | <i>a</i>      | <i>b</i>      | <i>ab</i>     | <i>a</i>      | <i>b</i>      | <i>ab</i>     | <i>a</i> | <i>b</i>     | <i>ab</i>    | <i>a</i>     | <i>b</i>     | <i>ab</i>    |
| Unique Factor Correlation = .1 |               |               |               |               |               |               |          |              |              |              |              |              |
| $\alpha(.7)$                   |               |               |               |               |               |               |          |              |              |              |              |              |
| CS                             | <b>-28.47</b> | <b>-27.09</b> | <b>-47.84</b> | <b>-28.41</b> | <b>-27.08</b> | <b>-47.80</b> | 1.97     | 1.05         | 3.06         | 2.47         | 1.54         | 4.07         |
| MS                             | <b>-28.47</b> | -7.67         | <b>-33.89</b> | <b>-28.41</b> | -7.66         | <b>-33.83</b> | 1.97     | <b>31.64</b> | <b>34.32</b> | <b>14.40</b> | <b>41.32</b> | <b>61.77</b> |
| $\alpha(.8)$                   |               |               |               |               |               |               |          |              |              |              |              |              |
| CS                             | <b>-19.14</b> | <b>-18.50</b> | <b>-34.09</b> | <b>-19.08</b> | <b>-18.47</b> | <b>-34.03</b> | 1.02     | 0.50         | 1.54         | 1.24         | 0.72         | 1.98         |
| MS                             | <b>-19.14</b> | 4.72          | <b>-15.26</b> | <b>-19.08</b> | 4.75          | <b>-15.17</b> | 1.02     | <b>30.89</b> | <b>32.30</b> | <b>10.28</b> | <b>37.48</b> | <b>51.70</b> |
| $\alpha(.9)$                   |               |               |               |               |               |               |          |              |              |              |              |              |
| CS                             | -9.56         | -9.48         | <b>-18.11</b> | -9.52         | -9.48         | <b>-18.09</b> | 0.46     | 0.20         | 0.68         | 0.54         | 0.30         | 0.86         |
| MS                             | -9.56         | <b>17.38</b>  | 6.23          | -9.52         | <b>17.38</b>  | 6.27          | 0.46     | <b>30.39</b> | <b>31.05</b> | 5.57         | <b>33.64</b> | <b>41.15</b> |
| Unique Factor Correlation = .3 |               |               |               |               |               |               |          |              |              |              |              |              |
| $\alpha(.7)$                   |               |               |               |               |               |               |          |              |              |              |              |              |
| CS                             | <b>-26.06</b> | <b>-25.58</b> | <b>-44.97</b> | <b>-26.20</b> | <b>-25.5</b>  | <b>-45.03</b> | 5.41     | 3.44         | 9.05         | 7.41         | 4.88         | <b>12.68</b> |
| MS                             | <b>-26.06</b> | -5.13         | <b>-29.78</b> | <b>-26.20</b> | -5.03         | <b>-29.85</b> | 5.41     | <b>35.40</b> | 42.81        | <b>19.56</b> | <b>46.69</b> | <b>75.48</b> |
| $\alpha(.8)$                   |               |               |               |               |               |               |          |              |              |              |              |              |
| CS                             | <b>-17.49</b> | <b>-17.18</b> | <b>-31.65</b> | <b>-17.46</b> | <b>-17.16</b> | <b>-31.63</b> | 3.07     | 2.33         | 5.49         | 3.77         | 2.95         | 6.85         |
| MS                             | <b>-17.49</b> | 6.62          | <b>-11.95</b> | <b>-17.46</b> | 6.63          | <b>-11.92</b> | 3.07     | <b>33.21</b> | <b>37.38</b> | <b>12.95</b> | <b>40.42</b> | <b>58.69</b> |
| $\alpha(.9)$                   |               |               |               |               |               |               |          |              |              |              |              |              |
| CS                             | -8.70         | -9.04         | <b>-16.95</b> | -8.67         | -9.06         | <b>-16.95</b> | 1.44     | 0.70         | 2.15         | 1.62         | 0.87         | 2.50         |
| MS                             | -8.70         | <b>18.33</b>  | 8.10          | -8.67         | <b>18.30</b>  | 8.10          | 1.44     | <b>31.44</b> | <b>33.39</b> | 6.77         | <b>34.88</b> | <b>44.08</b> |
| Unique Factor Correlation = .5 |               |               |               |               |               |               |          |              |              |              |              |              |
| $\alpha(.7)$                   |               |               |               |               |               |               |          |              |              |              |              |              |
| CS                             | <b>-23.17</b> | <b>-24.14</b> | <b>-41.71</b> | <b>-23.23</b> | <b>-24.09</b> | <b>-41.75</b> | 9.56     | 5.97         | <b>16.11</b> | <b>16.8</b>  | <b>11.05</b> | <b>29.74</b> |
| MS                             | <b>-23.17</b> | -2.50         | <b>-25.02</b> | <b>-23.23</b> | -2.44         | <b>-25.06</b> | 9.56     | <b>39.12</b> | <b>52.50</b> | <b>28.60</b> | <b>55.23</b> | <b>99.70</b> |
| $\alpha(.8)$                   |               |               |               |               |               |               |          |              |              |              |              |              |
| CS                             | <b>-15.35</b> | <b>-16.28</b> | <b>-29.12</b> | <b>-15.44</b> | <b>-16.22</b> | <b>-29.16</b> | 5.68     | 3.53         | 9.41         | 7.70         | 5.14         | <b>13.25</b> |
| MS                             | <b>-15.35</b> | 8.46          | -8.13         | <b>-15.44</b> | 8.52          | -8.18         | 5.68     | <b>35.49</b> | <b>43.24</b> | <b>17.11</b> | <b>44.28</b> | <b>69.04</b> |
| $\alpha(.9)$                   |               |               |               |               |               |               |          |              |              |              |              |              |
| CS                             | -7.88         | -8.19         | <b>-15.43</b> | -7.88         | -8.17         | <b>-15.42</b> | 2.32     | 1.75         | 4.10         | 2.70         | 2.10         | 4.85         |
| MS                             | -7.88         | <b>19.27</b>  | 9.93          | -7.88         | <b>19.30</b>  | 9.95          | 2.32     | <b>32.51</b> | <b>35.64</b> | 7.88         | <b>36.19</b> | <b>46.98</b> |

Note: Regression FS = regression FSR method, Bartlett FS = Bartlett FSR method, Croon = Croon's method using the original formulas uncorrected for unique factor correlations, SEM = Structural Equation Modeling (Simultaneous Estimation) under the assumption of conditionally independent uniquenesses, CS = correct structural model specification ( $c'$  path freely estimated), MS = structural misspecification ( $c'$  path constrained to 0). Bold entries indicate absolute values of percent bias > 10.

**Table 12**

Percent Bias in Models Correctly Specifying the Unique Factor Structure by Parameter and Simulation Condition, Simulation 1:  $N = 1000$ , 1 Unique Factor Correlation.

| Path:                          | Hoshino-Bentler |              |              | Croon FM |              |              | Croon MM |              |              | SEM          |              |              |
|--------------------------------|-----------------|--------------|--------------|----------|--------------|--------------|----------|--------------|--------------|--------------|--------------|--------------|
|                                | <i>a</i>        | <i>b</i>     | <i>ab</i>    | <i>a</i> | <i>b</i>     | <i>ab</i>    | <i>a</i> | <i>b</i>     | <i>ab</i>    | <i>a</i>     | <i>b</i>     | <i>ab</i>    |
| Unique Factor Correlation = .1 |                 |              |              |          |              |              |          |              |              |              |              |              |
| $\alpha(.7)$                   |                 |              |              |          |              |              |          |              |              |              |              |              |
| CS                             | 2.20            | 1.35         | 3.60         | 0.05     | -0.25        | -0.19        | 0.39     | 0.16         | 0.57         | 0.39         | 0.16         | 0.57         |
| MS                             | 2.20            | <b>32.00</b> | <b>34.99</b> | 0.05     | <b>29.70</b> | <b>29.86</b> | 0.39     | <b>30.20</b> | <b>30.80</b> | <b>12.26</b> | <b>39.20</b> | <b>56.37</b> |
| $\alpha(.8)$                   |                 |              |              |          |              |              |          |              |              |              |              |              |
| CS                             | 1.11            | 0.63         | 1.76         | -0.08    | -0.25        | -0.32        | 0.07     | -0.07        | 0.02         | 0.07         | -0.07        | 0.02         |
| MS                             | 1.11            | <b>31.05</b> | <b>32.57</b> | -0.08    | <b>29.73</b> | <b>29.70</b> | 0.07     | <b>29.96</b> | <b>30.14</b> | 9.05         | <b>36.26</b> | <b>48.67</b> |
| $\alpha(.9)$                   |                 |              |              |          |              |              |          |              |              |              |              |              |
| CS                             | 0.50            | 0.27         | 0.79         | -0.04    | -0.11        | -0.15        | 0.02     | -0.02        | 0.01         | 0.02         | -0.02        | 0.02         |
| MS                             | 0.50            | <b>30.45</b> | <b>31.17</b> | -0.04    | <b>29.89</b> | <b>29.89</b> | 0.02     | <b>29.98</b> | <b>30.08</b> | 4.98         | <b>33.11</b> | <b>39.81</b> |
| Unique Factor Correlation = .3 |                 |              |              |          |              |              |          |              |              |              |              |              |
| $\alpha(.7)$                   |                 |              |              |          |              |              |          |              |              |              |              |              |
| CS                             | 5.10            | 3.24         | 8.52         | -0.42    | -0.43        | -0.85        | -0.11    | -0.15        | -0.26        | -0.11        | -0.15        | -0.26        |
| MS                             | 5.10            | <b>35.10</b> | <b>42.08</b> | -0.42    | <b>29.56</b> | <b>29.10</b> | -0.11    | <b>29.94</b> | <b>29.88</b> | <b>11.41</b> | <b>38.58</b> | <b>54.50</b> |
| $\alpha(.8)$                   |                 |              |              |          |              |              |          |              |              |              |              |              |
| CS                             | 2.84            | 2.27         | 5.20         | -0.32    | 0.08         | -0.23        | -0.18    | 0.27         | 0.11         | -0.18        | 0.27         | 0.11         |
| MS                             | 2.84            | <b>33.06</b> | <b>36.92</b> | -0.32    | <b>29.79</b> | <b>29.45</b> | -0.18    | <b>30.01</b> | <b>29.86</b> | 8.31         | <b>35.90</b> | <b>47.28</b> |
| $\alpha(.9)$                   |                 |              |              |          |              |              |          |              |              |              |              |              |
| CS                             | 1.34            | 0.67         | 2.02         | -0.08    | -0.27        | -0.35        | -0.02    | -0.20        | -0.22        | -0.02        | -0.20        | -0.22        |
| MS                             | 1.34            | <b>31.37</b> | <b>33.19</b> | -0.08    | <b>29.93</b> | <b>29.89</b> | -0.02    | <b>30.02</b> | <b>30.06</b> | 4.67         | <b>32.95</b> | <b>39.23</b> |
| Unique Factor Correlation = .5 |                 |              |              |          |              |              |          |              |              |              |              |              |
| $\alpha(.7)$                   |                 |              |              |          |              |              |          |              |              |              |              |              |
| CS                             | 8.99            | 5.78         | 15.30        | -0.24    | -0.83        | -1.09        | 0.01     | -0.24        | -0.25        | 0.01         | -0.24        | -0.25        |
| MS                             | 8.99            | <b>38.71</b> | <b>51.26</b> | -0.24    | <b>29.22</b> | <b>28.97</b> | 0.01     | <b>29.79</b> | <b>29.88</b> | <b>10.81</b> | <b>37.84</b> | <b>52.83</b> |
| $\alpha(.8)$                   |                 |              |              |          |              |              |          |              |              |              |              |              |
| CS                             | 5.34            | 3.28         | 8.81         | -0.02    | -0.22        | -0.23        | 0.11     | -0.10        | 0.01         | 0.11         | -0.10        | 0.01         |
| MS                             | 5.34            | <b>35.17</b> | <b>42.46</b> | -0.02    | <b>29.80</b> | <b>29.85</b> | 0.11     | <b>29.99</b> | <b>30.20</b> | 7.95         | <b>35.40</b> | <b>46.26</b> |
| $\alpha(.9)$                   |                 |              |              |          |              |              |          |              |              |              |              |              |
| CS                             | 2.16            | 1.65         | 3.84         | -0.20    | 0.11         | -0.11        | -0.16    | 0.16         | -0.02        | -0.16        | 0.16         | -0.02        |
| MS                             | 2.16            | <b>32.36</b> | <b>35.28</b> | -0.20    | <b>29.99</b> | <b>29.78</b> | -0.16    | <b>30.06</b> | <b>29.90</b> | 3.97         | <b>32.63</b> | <b>37.96</b> |

Note: Hoshino-Bentler indicates Hoshino and Bentler's (2013) FSR method, Croon FM = Croon's method corrected for correlated uniquenesses at the factor model level, Croon MM = Croon's method corrected for correlated uniquenesses at the measurement model level, SEM = Structural Equation Modeling (Simultaneous Estimation) correctly specifying the correlated residual structure, CS = correct structural model specification ( $c'$  path freely estimated), MS = structural misspecification ( $c'$  path constrained to 0). Bold entries indicate absolute values of percent bias > 10.

**Table 13**

Percent Bias in Models Omitting the Unique Factor Correlations by Parameter and Simulation Condition, Simulation 1:  
*N* = 1000, 2 Unique Factor Correlations.

| Path:                          | Regression FS |               |               | Bartlett FS   |               |               | Croon        |              |              | SEM          |              |               |
|--------------------------------|---------------|---------------|---------------|---------------|---------------|---------------|--------------|--------------|--------------|--------------|--------------|---------------|
|                                | <i>a</i>      | <i>b</i>      | <i>ab</i>     | <i>a</i>      | <i>b</i>      | <i>ab</i>     | <i>a</i>     | <i>b</i>     | <i>ab</i>    | <i>a</i>     | <i>b</i>     | <i>ab</i>     |
| Unique Factor Correlation = .1 |               |               |               |               |               |               |              |              |              |              |              |               |
| $\alpha(.7)$                   |               |               |               |               |               |               |              |              |              |              |              |               |
| CS                             | <b>-27.27</b> | <b>-26.40</b> | <b>-46.47</b> | <b>-27.33</b> | <b>-26.37</b> | <b>-46.50</b> | 3.66         | 2.08         | 5.85         | 4.21         | 2.59         | 6.95          |
| MS                             | <b>-27.27</b> | -6.47         | <b>-31.91</b> | <b>-27.33</b> | -6.43         | <b>-31.94</b> | 3.66         | <b>33.38</b> | <b>38.36</b> | <b>16.25</b> | <b>43.17</b> | <b>66.54</b>  |
| $\alpha(.8)$                   |               |               |               |               |               |               |              |              |              |              |              |               |
| CS                             | <b>-18.38</b> | <b>-17.78</b> | <b>-32.88</b> | <b>-18.43</b> | <b>-17.70</b> | <b>-32.86</b> | 1.91         | 1.47         | 3.43         | 2.14         | 1.71         | 3.91          |
| MS                             | <b>-18.38</b> | 5.67          | <b>-13.68</b> | <b>-18.43</b> | 5.77          | <b>-13.65</b> | 1.91         | <b>32.08</b> | <b>34.69</b> | <b>11.22</b> | <b>38.70</b> | <b>54.36</b>  |
| $\alpha(.9)$                   |               |               |               |               |               |               |              |              |              |              |              |               |
| CS                             | -9.24         | -9.26         | <b>-17.64</b> | -9.25         | -9.28         | <b>-17.67</b> | 0.84         | 0.45         | 1.29         | 0.92         | 0.52         | 1.46          |
| MS                             | -9.24         | <b>17.74</b>  | 6.92          | -9.25         | <b>17.71</b>  | 6.88          | 0.84         | <b>30.79</b> | <b>31.95</b> | 5.99         | <b>34.07</b> | <b>42.17</b>  |
| Unique Factor Correlation = .3 |               |               |               |               |               |               |              |              |              |              |              |               |
| $\alpha(.7)$                   |               |               |               |               |               |               |              |              |              |              |              |               |
| CS                             | <b>-22.00</b> | <b>-23.03</b> | <b>-39.96</b> | <b>-22.02</b> | <b>-23.02</b> | <b>-39.98</b> | <b>11.26</b> | 7.92         | <b>20.08</b> | <b>13.49</b> | 9.79         | <b>24.62</b>  |
| MS                             | <b>-22.00</b> | -0.92         | <b>-22.66</b> | <b>-22.02</b> | -0.90         | <b>-22.67</b> | <b>11.26</b> | <b>41.36</b> | <b>57.34</b> | <b>25.51</b> | <b>52.91</b> | <b>91.99</b>  |
| $\alpha(.8)$                   |               |               |               |               |               |               |              |              |              |              |              |               |
| CS                             | <b>-14.94</b> | <b>-15.39</b> | <b>-28.02</b> | <b>-14.97</b> | <b>-15.35</b> | <b>-28.02</b> | 6.20         | 4.85         | <b>11.36</b> | 7.03         | 5.54         | <b>12.97</b>  |
| MS                             | <b>-14.94</b> | 9.43          | -6.85         | <b>-14.97</b> | 9.49          | -6.84         | 6.20         | <b>36.70</b> | <b>45.25</b> | <b>16.44</b> | <b>44.15</b> | <b>67.92</b>  |
| $\alpha(.9)$                   |               |               |               |               |               |               |              |              |              |              |              |               |
| CS                             | -7.26         | -8.15         | <b>-14.81</b> | -7.25         | -8.17         | <b>-14.83</b> | 3.02         | 1.76         | 4.83         | 3.22         | 1.95         | 5.24          |
| MS                             | -7.26         | <b>19.66</b>  | <b>11.03</b>  | -7.25         | <b>19.63</b>  | <b>11.01</b>  | 3.02         | <b>32.89</b> | <b>36.95</b> | 8.43         | <b>36.39</b> | <b>47.95</b>  |
| Unique Factor Correlation = .5 |               |               |               |               |               |               |              |              |              |              |              |               |
| $\alpha(.7)$                   |               |               |               |               |               |               |              |              |              |              |              |               |
| CS                             | <b>-16.35</b> | <b>-20.01</b> | <b>-33.08</b> | <b>-16.35</b> | <b>-20.04</b> | <b>-33.11</b> | <b>19.40</b> | <b>13.86</b> | <b>36.02</b> | <b>25.65</b> | <b>19.31</b> | <b>49.99</b>  |
| MS                             | <b>-16.35</b> | 4.42          | <b>-12.58</b> | <b>-16.35</b> | 4.38          | <b>-12.62</b> | <b>19.40</b> | <b>49.00</b> | <b>78.00</b> | <b>36.61</b> | <b>63.77</b> | <b>123.78</b> |
| $\alpha(.8)$                   |               |               |               |               |               |               |              |              |              |              |              |               |
| CS                             | <b>-10.99</b> | <b>-13.79</b> | <b>-23.24</b> | <b>-11.04</b> | <b>-13.76</b> | <b>-23.28</b> | <b>11.17</b> | 7.23         | <b>19.23</b> | <b>13.34</b> | 9.14         | <b>23.72</b>  |
| MS                             | <b>-10.99</b> | <b>12.86</b>  | 0.54          | <b>-11.04</b> | <b>12.89</b>  | 0.50          | <b>11.17</b> | <b>41.00</b> | <b>56.84</b> | <b>23.07</b> | <b>50.20</b> | <b>84.94</b>  |
| $\alpha(.9)$                   |               |               |               |               |               |               |              |              |              |              |              |               |
| CS                             | -5.30         | -6.92         | <b>-11.84</b> | -5.30         | -6.91         | <b>-11.84</b> | 5.18         | 3.30         | 8.67         | 5.64         | 3.72         | 9.59          |
| MS                             | -5.30         | <b>21.51</b>  | <b>15.14</b>  | -5.30         | <b>21.52</b>  | <b>15.14</b>  | 5.18         | <b>34.97</b> | <b>42.02</b> | <b>10.96</b> | <b>38.81</b> | <b>54.09</b>  |

Note: Regression FS = regression FSR method, Bartlett FS = Bartlett FSR method, Croon = Croon's method using the original formulas uncorrected for unique factor correlations, SEM = Structural Equation Modeling (Simultaneous Estimation) under the assumption of conditionally independent uniquenesses, CS = correct structural model specification (*c'* path freely estimated), MS = structural misspecification (*c'* path constrained to 0). Bold entries indicate absolute values of percent bias > 10.

**Table 14**

Percent Bias in Models Correctly Specifying the Unique Factor Structure by Parameter and Simulation Condition, Simulation 1:  $N = 1000$ , 2 Unique Factor Correlations.

| Path:                          | Hoshino-Bentler |              |              | Croon FM |              |              | Croon MM |              |              | SEM          |              |              |
|--------------------------------|-----------------|--------------|--------------|----------|--------------|--------------|----------|--------------|--------------|--------------|--------------|--------------|
|                                | <i>a</i>        | <i>b</i>     | <i>ab</i>    | <i>a</i> | <i>b</i>     | <i>ab</i>    | <i>a</i> | <i>b</i>     | <i>ab</i>    | <i>a</i>     | <i>b</i>     | <i>ab</i>    |
| Unique Factor Correlation = .1 |                 |              |              |          |              |              |          |              |              |              |              |              |
| $\alpha(.7)$                   |                 |              |              |          |              |              |          |              |              |              |              |              |
| CS                             | 3.81            | 2.29         | 6.22         | -0.19    | -0.47        | -0.65        | 0.13     | -0.10        | 0.06         | 0.13         | -0.10        | 0.06         |
| MS                             | 3.81            | <b>33.62</b> | <b>38.81</b> | -0.19    | <b>29.49</b> | <b>29.33</b> | 0.13     | <b>29.94</b> | <b>30.21</b> | <b>12.05</b> | <b>38.99</b> | <b>55.85</b> |
| $\alpha(.8)$                   |                 |              |              |          |              |              |          |              |              |              |              |              |
| CS                             | 1.96            | 1.58         | 3.59         | -0.33    | -0.01        | -0.33        | -0.19    | 0.17         | 0.00         | -0.19        | 0.17         | 0.00         |
| MS                             | 1.96            | <b>32.19</b> | <b>34.86</b> | -0.33    | <b>29.81</b> | <b>29.46</b> | -0.19    | <b>30.02</b> | <b>29.86</b> | <b>8.74</b>  | <b>36.28</b> | <b>48.29</b> |
| $\alpha(.9)$                   |                 |              |              |          |              |              |          |              |              |              |              |              |
| CS                             | 0.86            | 0.48         | 1.35         | -0.18    | -0.21        | -0.38        | -0.12    | -0.14        | -0.25        | -0.12        | -0.14        | -0.25        |
| MS                             | 0.86            | <b>30.83</b> | <b>32.02</b> | -0.18    | <b>29.78</b> | <b>29.60</b> | -0.12    | <b>29.86</b> | <b>29.77</b> | 4.81         | <b>32.97</b> | <b>39.43</b> |
| Unique Factor Correlation = .3 |                 |              |              |          |              |              |          |              |              |              |              |              |
| $\alpha(.7)$                   |                 |              |              |          |              |              |          |              |              |              |              |              |
| CS                             | <b>10.43</b>    | 7.49         | <b>18.72</b> | -0.42    | -0.03        | -0.46        | -0.16    | 0.37         | 0.20         | -0.16        | 0.37         | 0.20         |
| MS                             | <b>10.43</b>    | <b>40.62</b> | <b>55.37</b> | -0.42    | <b>29.70</b> | <b>29.23</b> | -0.16    | <b>30.12</b> | <b>29.99</b> | <b>10.84</b> | <b>38.30</b> | <b>53.41</b> |
| $\alpha(.8)$                   |                 |              |              |          |              |              |          |              |              |              |              |              |
| CS                             | 5.69            | 4.51         | <b>10.47</b> | -0.60    | 0.28         | -0.31        | -0.49    | 0.40         | -0.08        | -0.49        | 0.40         | -0.08        |
| MS                             | 5.69            | <b>36.23</b> | <b>44.05</b> | -0.60    | <b>29.89</b> | <b>29.18</b> | -0.49    | <b>30.06</b> | <b>29.50</b> | 7.54         | <b>35.56</b> | <b>45.87</b> |
| $\alpha(.9)$                   |                 |              |              |          |              |              |          |              |              |              |              |              |
| CS                             | 2.80            | 1.64         | 4.48         | 0.01     | -0.25        | -0.24        | 0.07     | -0.17        | -0.10        | 0.07         | -0.17        | -0.10        |
| MS                             | 2.80            | <b>32.68</b> | <b>36.44</b> | 0.01     | <b>29.84</b> | <b>29.91</b> | 0.07     | <b>29.92</b> | <b>30.07</b> | 4.34         | <b>32.59</b> | <b>38.41</b> |
| Unique Factor Correlation = .5 |                 |              |              |          |              |              |          |              |              |              |              |              |
| $\alpha(.7)$                   |                 |              |              |          |              |              |          |              |              |              |              |              |
| CS                             | <b>17.53</b>    | <b>12.36</b> | <b>32.12</b> | -0.06    | -0.27        | -0.31        | 0.16     | 0.16         | 0.35         | 0.16         | 0.16         | 0.35         |
| MS                             | <b>17.53</b>    | <b>47.17</b> | <b>73.07</b> | -0.06    | <b>29.45</b> | <b>29.47</b> | 0.16     | <b>29.89</b> | <b>30.21</b> | 9.62         | <b>36.80</b> | <b>50.09</b> |
| $\alpha(.8)$                   |                 |              |              |          |              |              |          |              |              |              |              |              |
| CS                             | <b>10.01</b>    | 6.55         | <b>17.24</b> | -0.18    | -0.49        | -0.65        | -0.10    | -0.24        | -0.33        | -0.10        | -0.24        | -0.33        |
| MS                             | <b>10.01</b>    | <b>39.94</b> | <b>54.04</b> | -0.18    | <b>29.60</b> | <b>29.47</b> | -0.10    | <b>29.84</b> | <b>29.80</b> | 6.58         | <b>34.35</b> | <b>43.30</b> |
| $\alpha(.9)$                   |                 |              |              |          |              |              |          |              |              |              |              |              |
| CS                             | 4.69            | 2.97         | 7.81         | 0.14     | -0.04        | 0.12         | 0.20     | 0.01         | 0.22         | 0.20         | 0.01         | 0.22         |
| MS                             | 4.69            | <b>34.45</b> | <b>40.82</b> | 0.14     | <b>29.92</b> | <b>30.16</b> | 0.20     | <b>29.96</b> | <b>30.29</b> | 3.54         | <b>32.00</b> | <b>36.76</b> |

Note: Hoshino-Bentler indicates Hoshino and Bentler's (2013) FSR method, Croon FM = Croon's method corrected for correlated uniquenesses at the factor model level, Croon MM = Croon's method corrected for correlated uniquenesses at the measurement model level, SEM = Structural Equation Modeling (Simultaneous Estimation) correctly specifying the correlated residual structure, CS = correct structural model specification ( $c'$  path freely estimated), MS = structural misspecification ( $c'$  path constrained to 0). Bold entries indicate absolute values of percent bias > 10.

**Table 15**

Mean square error ratios in Models Correctly Specifying the Unique Factor Structure by Parameter and Simulation Condition, Simulation 1:  $N = 125$ , 1 Unique Factor Correlation.

| Path:                          | Hoshino-Bentler |          |           | Croon FM |          |           | SEM      |          |           |
|--------------------------------|-----------------|----------|-----------|----------|----------|-----------|----------|----------|-----------|
|                                | <i>a</i>        | <i>b</i> | <i>ab</i> | <i>a</i> | <i>b</i> | <i>ab</i> | <i>a</i> | <i>b</i> | <i>ab</i> |
| Unique Factor Correlation = .1 |                 |          |           |          |          |           |          |          |           |
| $\alpha(.7)$                   |                 |          |           |          |          |           |          |          |           |
| CS                             | 0.99            | 1.02     | 1.05      | 0.96     | 0.92     | 0.91      | 1.00     | 1.00     | 1.00      |
| MS                             | 0.99            | 1.08     | 1.14      | 0.96     | 0.82     | 0.78      | 1.27     | 1.54     | 2.21      |
| $\alpha(.8)$                   |                 |          |           |          |          |           |          |          |           |
| CS                             | 1.00            | 1.02     | 1.05      | 0.99     | 0.96     | 0.92      | 1.00     | 1.00     | 1.00      |
| MS                             | 1.00            | 1.05     | 1.09      | 0.99     | 0.9      | 0.86      | 1.27     | 1.38     | 1.89      |
| $\alpha(.9)$                   |                 |          |           |          |          |           |          |          |           |
| CS                             | 1.00            | 1.01     | 1.01      | 0.99     | 0.98     | 0.97      | 1.00     | 1.00     | 1.00      |
| MS                             | 1.00            | 1.03     | 1.05      | 0.99     | 0.95     | 0.93      | 1.06     | 1.19     | 1.49      |
| Unique Factor Correlation = .3 |                 |          |           |          |          |           |          |          |           |
| $\alpha(.7)$                   |                 |          |           |          |          |           |          |          |           |
| CS                             | 1.07            | 1.11     | 1.26      | 0.99     | 0.95     | 0.91      | 1.00     | 1.00     | 1.00      |
| MS                             | 1.07            | 1.25     | 1.46      | 0.99     | 0.81     | 0.76      | 1.24     | 1.48     | 2.08      |
| $\alpha(.8)$                   |                 |          |           |          |          |           |          |          |           |
| CS                             | 1.03            | 1.07     | 1.13      | 0.98     | 0.97     | 0.94      | 1.00     | 1.00     | 1.00      |
| MS                             | 1.03            | 1.18     | 1.30      | 0.98     | 0.91     | 0.87      | 1.23     | 1.35     | 1.85      |
| $\alpha(.9)$                   |                 |          |           |          |          |           |          |          |           |
| CS                             | 1.00            | 1.02     | 1.03      | 1.00     | 0.99     | 0.99      | 1.00     | 1.00     | 1.00      |
| MS                             | 1.00            | 1.08     | 1.14      | 1.00     | 0.96     | 0.94      | 1.05     | 1.18     | 1.47      |
| Unique Factor Correlation = .5 |                 |          |           |          |          |           |          |          |           |
| $\alpha(.7)$                   |                 |          |           |          |          |           |          |          |           |
| CS                             | 1.21            | 1.30     | 1.65      | 1.03     | 1.03     | 0.97      | 1.00     | 1.00     | 1.00      |
| MS                             | 1.21            | 1.50     | 1.92      | 1.03     | 0.82     | 0.80      | 1.27     | 1.48     | 2.08      |
| $\alpha(.8)$                   |                 |          |           |          |          |           |          |          |           |
| CS                             | 1.04            | 1.11     | 1.22      | 1.03     | 1.04     | 1.03      | 1.00     | 1.00     | 1.00      |
| MS                             | 1.04            | 1.31     | 1.56      | 1.03     | 0.92     | 0.89      | 1.16     | 1.33     | 1.83      |
| $\alpha(.9)$                   |                 |          |           |          |          |           |          |          |           |
| CS                             | 1.01            | 1.05     | 1.08      | 1.01     | 1.00     | 0.99      | 1.00     | 1.00     | 1.00      |
| MS                             | 1.01            | 1.14     | 1.26      | 1.01     | 0.96     | 0.95      | 1.06     | 1.16     | 1.42      |

Note: Hoshino-Bentler indicates Hoshino and Bentler's (2013) FSR method, Croon FM = Croon's method corrected for correlated uniquenesses at the factor model level, SEM = Structural Equation Modeling (Simultaneous Estimation), with correctly specified unique factor structure, CS = correct structural model specification (*c*' path freely estimated), MS = structural misspecification (*c*' path constrained to 0). All MSE ratios are divided by the MSE for Croon's method corrected for correlated uniquenesses at the measurement model level (Croon MM), i.e.,  $MSE_{Estimator}/MSE_{Croon\_MM}$ .

**Table 16**

Mean square error ratios in Models Correctly Specifying the Unique Factor Structure by Parameter and Simulation Condition, Simulation 1:  $N = 250$ , 1 Unique Factor Correlation.

| Path:                          | Hoshino-Bentler |          |           | Croon FM |          |           | SEM      |          |           |
|--------------------------------|-----------------|----------|-----------|----------|----------|-----------|----------|----------|-----------|
|                                | <i>a</i>        | <i>b</i> | <i>ab</i> | <i>a</i> | <i>b</i> | <i>ab</i> | <i>a</i> | <i>b</i> | <i>ab</i> |
| Unique Factor Correlation = .1 |                 |          |           |          |          |           |          |          |           |
| $\alpha(.7)$                   |                 |          |           |          |          |           |          |          |           |
| CS                             | 1.01            | 1.02     | 1.06      | 0.99     | 0.95     | 0.93      | 1.00     | 1.00     | 1.00      |
| MS                             | 1.01            | 1.10     | 1.18      | 0.99     | 0.90     | 0.85      | 1.69     | 1.59     | 2.54      |
| $\alpha(.8)$                   |                 |          |           |          |          |           |          |          |           |
| CS                             | 1.01            | 1.01     | 1.04      | 0.99     | 0.98     | 0.98      | 1.00     | 1.00     | 1.00      |
| MS                             | 1.01            | 1.06     | 1.12      | 0.99     | 0.95     | 0.91      | 1.62     | 1.41     | 2.19      |
| $\alpha(.9)$                   |                 |          |           |          |          |           |          |          |           |
| CS                             | 0.99            | 1.00     | 1.00      | 1.00     | 1.00     | 1.00      | 1.00     | 1.00     | 1.00      |
| MS                             | 0.99            | 1.03     | 1.06      | 1.00     | 0.98     | 0.96      | 1.17     | 1.21     | 1.60      |
| Unique Factor Correlation = .3 |                 |          |           |          |          |           |          |          |           |
| $\alpha(.7)$                   |                 |          |           |          |          |           |          |          |           |
| CS                             | 1.08            | 1.16     | 1.33      | 1.00     | 0.97     | 0.95      | 1.00     | 1.00     | 1.00      |
| MS                             | 1.08            | 1.32     | 1.61      | 1.00     | 0.89     | 0.85      | 1.43     | 1.55     | 2.40      |
| $\alpha(.8)$                   |                 |          |           |          |          |           |          |          |           |
| CS                             | 1.04            | 1.08     | 1.17      | 1.00     | 1.00     | 0.98      | 1.00     | 1.00     | 1.00      |
| MS                             | 1.04            | 1.19     | 1.38      | 1.00     | 0.94     | 0.91      | 1.54     | 1.40     | 2.14      |
| $\alpha(.9)$                   |                 |          |           |          |          |           |          |          |           |
| CS                             | 1.00            | 1.03     | 1.06      | 1.00     | 1.01     | 1.00      | 1.00     | 1.00     | 1.00      |
| MS                             | 1.00            | 1.09     | 1.17      | 1.00     | 0.98     | 0.97      | 1.18     | 1.19     | 1.55      |
| Unique Factor Correlation = .5 |                 |          |           |          |          |           |          |          |           |
| $\alpha(.7)$                   |                 |          |           |          |          |           |          |          |           |
| CS                             | 1.50            | 1.32     | 1.86      | 1.03     | 1.08     | 1.02      | 1.00     | 1.00     | 1.00      |
| MS                             | 1.50            | 1.58     | 2.22      | 1.03     | 0.90     | 0.85      | 1.72     | 1.52     | 2.38      |
| $\alpha(.8)$                   |                 |          |           |          |          |           |          |          |           |
| CS                             | 1.25            | 1.17     | 1.44      | 1.01     | 1.06     | 1.02      | 1.00     | 1.00     | 1.00      |
| MS                             | 1.25            | 1.34     | 1.72      | 1.01     | 0.95     | 0.92      | 1.53     | 1.36     | 2.01      |
| $\alpha(.9)$                   |                 |          |           |          |          |           |          |          |           |
| CS                             | 1.05            | 1.06     | 1.13      | 1.01     | 1.02     | 1.00      | 1.00     | 1.00     | 1.00      |
| MS                             | 1.05            | 1.15     | 1.30      | 1.01     | 0.98     | 0.96      | 1.19     | 1.17     | 1.49      |

Note: Hoshino-Bentler indicates Hoshino and Bentler's (2013) FSR method, Croon FM = Croon's method corrected for correlated uniquenesses at the factor model level, SEM = Structural Equation Modeling (Simultaneous Estimation), with correctly specified unique factor structure, CS = correct structural model specification (*c*' path freely estimated), MS = structural misspecification (*c*' path constrained to 0). All MSE ratios are divided by the MSE for Croon's method corrected for correlated uniquenesses at the measurement model level (Croon MM), i.e.,  $MSE_{Estimator}/MSE_{Croon\_MM}$ .



**Table 17**

Mean square error ratios in Models Correctly Specifying the Unique Factor Structure by Parameter and Simulation Condition, Simulation 1:  $N = 250$ , 2 Unique Factor Correlations.

| Path:                          | Hoshino-Bentler |          |           | Croon FM |          |           | SEM      |          |           |
|--------------------------------|-----------------|----------|-----------|----------|----------|-----------|----------|----------|-----------|
|                                | <i>a</i>        | <i>b</i> | <i>ab</i> | <i>a</i> | <i>b</i> | <i>ab</i> | <i>a</i> | <i>b</i> | <i>ab</i> |
| Unique Factor Correlation = .1 |                 |          |           |          |          |           |          |          |           |
| $\alpha(.7)$                   |                 |          |           |          |          |           |          |          |           |
| CS                             | 1.04            | 1.06     | 1.17      | 0.98     | 0.96     | 0.94      | 1.00     | 1.00     | 1.00      |
| MS                             | 1.04            | 1.21     | 1.40      | 0.98     | 0.89     | 0.85      | 1.74     | 1.59     | 2.55      |
| $\alpha(.8)$                   |                 |          |           |          |          |           |          |          |           |
| CS                             | 1.03            | 1.04     | 1.11      | 0.98     | 0.98     | 0.95      | 1.00     | 1.00     | 1.00      |
| MS                             | 1.03            | 1.13     | 1.25      | 0.98     | 0.94     | 0.91      | 1.65     | 1.42     | 2.15      |
| $\alpha(.9)$                   |                 |          |           |          |          |           |          |          |           |
| CS                             | 1.01            | 1.01     | 1.03      | 1.00     | 0.99     | 0.98      | 1.00     | 1.00     | 1.00      |
| MS                             | 1.01            | 1.06     | 1.12      | 1.00     | 0.98     | 0.96      | 1.24     | 1.20     | 1.59      |
| Unique Factor Correlation = .3 |                 |          |           |          |          |           |          |          |           |
| $\alpha(.7)$                   |                 |          |           |          |          |           |          |          |           |
| CS                             | 1.56            | 1.38     | 2.00      | 1.00     | 1.02     | 0.99      | 1.00     | 1.00     | 1.00      |
| MS                             | 1.56            | 1.71     | 2.55      | 1.00     | 0.90     | 0.87      | 1.59     | 1.57     | 2.48      |
| $\alpha(.8)$                   |                 |          |           |          |          |           |          |          |           |
| CS                             | 1.29            | 1.22     | 1.57      | 1.01     | 1.00     | 0.99      | 1.00     | 1.00     | 1.00      |
| MS                             | 1.29            | 1.40     | 1.87      | 1.01     | 0.95     | 0.93      | 1.52     | 1.37     | 2.05      |
| $\alpha(.9)$                   |                 |          |           |          |          |           |          |          |           |
| CS                             | 1.06            | 1.07     | 1.16      | 1.00     | 1.01     | 1.00      | 1.00     | 1.00     | 1.00      |
| MS                             | 1.06            | 1.18     | 1.37      | 1.00     | 0.98     | 0.97      | 1.18     | 1.18     | 1.52      |
| Unique Factor Correlation = .5 |                 |          |           |          |          |           |          |          |           |
| $\alpha(.7)$                   |                 |          |           |          |          |           |          |          |           |
| CS                             | 2.59            | 2.18     | 4.05      | 1.02     | 1.12     | 1.04      | 1.00     | 1.00     | 1.00      |
| MS                             | 2.59            | 2.28     | 4.10      | 1.02     | 0.93     | 0.90      | 1.46     | 1.46     | 2.20      |
| $\alpha(.8)$                   |                 |          |           |          |          |           |          |          |           |
| CS                             | 1.77            | 1.52     | 2.33      | 1.02     | 1.04     | 1.00      | 1.00     | 1.00     | 1.00      |
| MS                             | 1.77            | 1.71     | 2.61      | 1.02     | 0.96     | 0.94      | 1.34     | 1.30     | 1.83      |
| $\alpha(.9)$                   |                 |          |           |          |          |           |          |          |           |
| CS                             | 1.20            | 1.20     | 1.42      | 1.02     | 1.01     | 1.00      | 1.00     | 1.00     | 1.00      |
| MS                             | 1.20            | 1.30     | 1.65      | 1.02     | 0.98     | 0.97      | 1.11     | 1.13     | 1.39      |

Note: Hoshino-Bentler indicates Hoshino and Bentler's (2013) FSR method, Croon FM = Croon's method corrected for correlated uniquenesses at the factor model level, SEM = Structural Equation Modeling (Simultaneous Estimation), with correctly specified unique factor structure, CS = correct structural model specification (*c*' path freely estimated), MS = structural misspecification (*c*' path constrained to 0). All MSE ratios are divided by the MSE for Croon's method corrected for correlated uniquenesses at the measurement model level (Croon MM), i.e.,  $MSE_{Estimator}/MSE_{Croon\_MM}$ .

**Table 18**

Mean square error ratios in Models Correctly Specifying the Unique Factor Structure by Parameter and Simulation Condition, Simulation 1:  $N = 500$ , 1 Unique Factor Correlation.

| Path:                          | Hoshino-Bentler |          |           | Croon FM |          |           | SEM      |          |           |
|--------------------------------|-----------------|----------|-----------|----------|----------|-----------|----------|----------|-----------|
|                                | <i>a</i>        | <i>b</i> | <i>ab</i> | <i>a</i> | <i>b</i> | <i>ab</i> | <i>a</i> | <i>b</i> | <i>ab</i> |
| Unique Factor Correlation = .1 |                 |          |           |          |          |           |          |          |           |
| $\alpha(.7)$                   |                 |          |           |          |          |           |          |          |           |
| CS                             | 1.01            | 1.02     | 1.07      | 0.99     | 0.98     | 0.97      | 1.00     | 1.00     | 1.00      |
| MS                             | 1.01            | 1.11     | 1.23      | 0.99     | 0.94     | 0.9       | 2.43     | 1.64     | 2.93      |
| $\alpha(.8)$                   |                 |          |           |          |          |           |          |          |           |
| CS                             | 1.01            | 1.03     | 1.05      | 0.99     | 1.00     | 0.99      | 1.00     | 1.00     | 1.00      |
| MS                             | 1.01            | 1.07     | 1.15      | 0.99     | 0.97     | 0.95      | 2.22     | 1.44     | 2.37      |
| $\alpha(.9)$                   |                 |          |           |          |          |           |          |          |           |
| CS                             | 0.99            | 1.00     | 1.00      | 1.00     | 1.00     | 1.00      | 1.00     | 1.00     | 1.00      |
| MS                             | 0.99            | 1.03     | 1.07      | 1.00     | 0.99     | 0.98      | 1.50     | 1.22     | 1.68      |
| Unique Factor Correlation = .3 |                 |          |           |          |          |           |          |          |           |
| $\alpha(.7)$                   |                 |          |           |          |          |           |          |          |           |
| CS                             | 1.31            | 1.21     | 1.54      | 0.99     | 1.01     | 0.97      | 1.00     | 1.00     | 1.00      |
| MS                             | 1.31            | 1.35     | 1.77      | 0.99     | 0.95     | 0.91      | 2.36     | 1.60     | 2.76      |
| $\alpha(.8)$                   |                 |          |           |          |          |           |          |          |           |
| CS                             | 1.13            | 1.10     | 1.27      | 1.01     | 1.00     | 0.98      | 1.00     | 1.00     | 1.00      |
| MS                             | 1.13            | 1.20     | 1.44      | 1.01     | 0.97     | 0.95      | 2.13     | 1.41     | 2.27      |
| $\alpha(.9)$                   |                 |          |           |          |          |           |          |          |           |
| CS                             | 1.04            | 1.03     | 1.08      | 1.00     | 1.01     | 1.00      | 1.00     | 1.00     | 1.00      |
| MS                             | 1.04            | 1.09     | 1.19      | 1.00     | 0.99     | 0.98      | 1.47     | 1.20     | 1.61      |
| Unique Factor Correlation = .5 |                 |          |           |          |          |           |          |          |           |
| $\alpha(.7)$                   |                 |          |           |          |          |           |          |          |           |
| CS                             | 2.03            | 1.46     | 2.49      | 1.01     | 1.09     | 1.02      | 1.00     | 1.00     | 1.00      |
| MS                             | 2.03            | 1.63     | 2.49      | 1.01     | 0.94     | 0.92      | 2.43     | 1.56     | 2.63      |
| $\alpha(.8)$                   |                 |          |           |          |          |           |          |          |           |
| CS                             | 1.37            | 1.27     | 1.71      | 1.02     | 1.06     | 1.03      | 1.00     | 1.00     | 1.00      |
| MS                             | 1.37            | 1.36     | 1.83      | 1.02     | 0.97     | 0.96      | 1.83     | 1.38     | 2.14      |
| $\alpha(.9)$                   |                 |          |           |          |          |           |          |          |           |
| CS                             | 1.14            | 1.07     | 1.22      | 1.01     | 1.05     | 1.02      | 1.00     | 1.00     | 1.00      |
| MS                             | 1.14            | 1.15     | 1.34      | 1.01     | 0.99     | 0.98      | 1.40     | 1.17     | 1.53      |

Note: Hoshino-Bentler indicates Hoshino and Bentler's (2013) FSR method, Croon FM = Croon's method corrected for correlated uniquenesses at the factor model level, SEM = Structural Equation Modeling (Simultaneous Estimation), with correctly specified unique factor structure, CS = correct structural model specification (*c*' path freely estimated), MS = structural misspecification (*c*' path constrained to 0). All MSE ratios are divided by the MSE for Croon's method corrected for correlated uniquenesses at the measurement model level (Croon MM), i.e.,  $MSE_{Estimator}/MSE_{Croon\_MM}$ .

**Table 19**

Mean square error ratios in Models Correctly Specifying the Unique Factor Structure by Parameter and Simulation Condition, Simulation 1:  $N = 500$ , 2 Unique Factor Correlations.

| Path:                          | Hoshino-Bentler |          |           | Croon FM |          |           | SEM      |          |           |
|--------------------------------|-----------------|----------|-----------|----------|----------|-----------|----------|----------|-----------|
|                                | <i>a</i>        | <i>b</i> | <i>ab</i> | <i>a</i> | <i>b</i> | <i>ab</i> | <i>a</i> | <i>b</i> | <i>ab</i> |
| Unique Factor Correlation = .1 |                 |          |           |          |          |           |          |          |           |
| $\alpha(.7)$                   |                 |          |           |          |          |           |          |          |           |
| CS                             | 1.15            | 1.11     | 1.30      | 0.99     | 0.99     | 0.98      | 1.00     | 1.00     | 1.00      |
| MS                             | 1.15            | 1.24     | 1.51      | 0.99     | 0.94     | 0.91      | 2.58     | 1.64     | 2.90      |
| $\alpha(.8)$                   |                 |          |           |          |          |           |          |          |           |
| CS                             | 1.07            | 1.03     | 1.14      | 0.99     | 1.00     | 0.99      | 1.00     | 1.00     | 1.00      |
| MS                             | 1.07            | 1.14     | 1.31      | 0.99     | 0.97     | 0.95      | 2.29     | 1.44     | 2.38      |
| $\alpha(.9)$                   |                 |          |           |          |          |           |          |          |           |
| CS                             | 1.00            | 1.01     | 1.03      | 1.00     | 1.00     | 1.00      | 1.00     | 1.00     | 1.00      |
| MS                             | 1.00            | 1.06     | 1.13      | 1.00     | 0.99     | 0.98      | 1.44     | 1.21     | 1.66      |
| Unique Factor Correlation = .3 |                 |          |           |          |          |           |          |          |           |
| $\alpha(.7)$                   |                 |          |           |          |          |           |          |          |           |
| CS                             | 2.19            | 1.70     | 3.02      | 1.01     | 1.04     | 1.00      | 1.00     | 1.00     | 1.00      |
| MS                             | 2.19            | 1.75     | 2.85      | 1.01     | 0.95     | 0.93      | 2.3      | 1.58     | 2.72      |
| $\alpha(.8)$                   |                 |          |           |          |          |           |          |          |           |
| CS                             | 1.67            | 1.29     | 1.95      | 1.01     | 1.04     | 1.01      | 1.00     | 1.00     | 1.00      |
| MS                             | 1.67            | 1.44     | 2.01      | 1.01     | 0.97     | 0.95      | 2.13     | 1.39     | 2.2       |
| $\alpha(.9)$                   |                 |          |           |          |          |           |          |          |           |
| CS                             | 1.12            | 1.13     | 1.27      | 1.00     | 1.01     | 1.00      | 1.00     | 1.00     | 1.00      |
| MS                             | 1.12            | 1.18     | 1.41      | 1.00     | 0.99     | 0.99      | 1.31     | 1.18     | 1.56      |
| Unique Factor Correlation = .5 |                 |          |           |          |          |           |          |          |           |
| $\alpha(.7)$                   |                 |          |           |          |          |           |          |          |           |
| CS                             | 4.31            | 2.71     | 6.28      | 1.03     | 1.20     | 1.12      | 1.00     | 1.00     | 1.00      |
| MS                             | 4.31            | 2.41     | 5.00      | 1.03     | 0.97     | 0.94      | 1.91     | 1.50     | 2.49      |
| $\alpha(.8)$                   |                 |          |           |          |          |           |          |          |           |
| CS                             | 2.71            | 1.87     | 3.68      | 1.01     | 1.11     | 1.04      | 1.00     | 1.00     | 1.00      |
| MS                             | 2.71            | 1.74     | 2.89      | 1.01     | 0.98     | 0.96      | 1.74     | 1.31     | 1.94      |
| $\alpha(.9)$                   |                 |          |           |          |          |           |          |          |           |
| CS                             | 1.46            | 1.23     | 1.71      | 1.01     | 1.06     | 1.03      | 1.00     | 1.00     | 1.00      |
| MS                             | 1.46            | 1.31     | 1.73      | 1.01     | 0.99     | 0.99      | 1.27     | 1.14     | 1.44      |

Note: Hoshino-Bentler indicates Hoshino and Bentler's (2013) FSR method, Croon FM = Croon's method corrected for correlated uniquenesses at the factor model level, SEM = Structural Equation Modeling (Simultaneous Estimation), with correctly specified unique factor structure, CS = correct structural model specification (*c*' path freely estimated), MS = structural misspecification (*c*' path constrained to 0). All MSE ratios are divided by the MSE for Croon's method corrected for correlated uniquenesses at the measurement model level (Croon MM), i.e.,  $MSE_{Estimator}/MSE_{Croon\_MM}$ .

**Table 20**

Mean square error ratios in Models Correctly Specifying the Unique Factor Structure by Parameter and Simulation Condition, Simulation 1:  $N = 1000$ , 1 Unique Factor Correlation.

| Path:                          | Hoshino-Bentler |          |           | Croon FM |          |           | SEM      |          |           |
|--------------------------------|-----------------|----------|-----------|----------|----------|-----------|----------|----------|-----------|
|                                | <i>a</i>        | <i>b</i> | <i>ab</i> | <i>a</i> | <i>b</i> | <i>ab</i> | <i>a</i> | <i>b</i> | <i>ab</i> |
| Unique Factor Correlation = .1 |                 |          |           |          |          |           |          |          |           |
| $\alpha(.7)$                   |                 |          |           |          |          |           |          |          |           |
| CS                             | 1.09            | 1.05     | 1.14      | 0.99     | 0.98     | 0.97      | 1.00     | 1.00     | 1.00      |
| MS                             | 1.09            | 1.12     | 1.26      | 0.99     | 0.97     | 0.95      | 4.08     | 1.66     | 3.06      |
| $\alpha(.8)$                   |                 |          |           |          |          |           |          |          |           |
| CS                             | 1.03            | 1.02     | 1.06      | 1.00     | 1.00     | 1.00      | 1.00     | 1.00     | 1.00      |
| MS                             | 1.03            | 1.07     | 1.15      | 1.00     | 0.98     | 0.97      | 3.26     | 1.45     | 2.46      |
| $\alpha(.9)$                   |                 |          |           |          |          |           |          |          |           |
| CS                             | 1.01            | 1.01     | 1.02      | 1.00     | 1.00     | 1.00      | 1.00     | 1.00     | 1.00      |
| MS                             | 1.01            | 1.03     | 1.07      | 1.00     | 0.99     | 0.99      | 2.12     | 1.22     | 1.71      |
| Unique Factor Correlation = .3 |                 |          |           |          |          |           |          |          |           |
| $\alpha(.7)$                   |                 |          |           |          |          |           |          |          |           |
| CS                             | 1.60            | 1.24     | 1.80      | 1.01     | 1.01     | 1.00      | 1.00     | 1.00     | 1.00      |
| MS                             | 1.60            | 1.36     | 1.87      | 1.01     | 0.98     | 0.95      | 3.96     | 1.64     | 3.05      |
| $\alpha(.8)$                   |                 |          |           |          |          |           |          |          |           |
| CS                             | 1.24            | 1.17     | 1.42      | 1.01     | 1.01     | 1.00      | 1.00     | 1.00     | 1.00      |
| MS                             | 1.24            | 1.21     | 1.48      | 1.01     | 0.99     | 0.97      | 3.16     | 1.42     | 2.38      |
| $\alpha(.9)$                   |                 |          |           |          |          |           |          |          |           |
| CS                             | 1.07            | 1.03     | 1.10      | 1.00     | 1.00     | 1.00      | 1.00     | 1.00     | 1.00      |
| MS                             | 1.07            | 1.09     | 1.20      | 1.00     | 0.99     | 0.99      | 1.88     | 1.20     | 1.66      |
| Unique Factor Correlation = .5 |                 |          |           |          |          |           |          |          |           |
| $\alpha(.7)$                   |                 |          |           |          |          |           |          |          |           |
| CS                             | 3.03            | 1.72     | 3.69      | 1.03     | 1.11     | 1.06      | 1.00     | 1.00     | 1.00      |
| MS                             | 3.03            | 1.67     | 2.74      | 1.03     | 0.97     | 0.95      | 3.87     | 1.59     | 2.90      |
| $\alpha(.8)$                   |                 |          |           |          |          |           |          |          |           |
| CS                             | 2.05            | 1.31     | 2.19      | 1.01     | 1.09     | 1.05      | 1.00     | 1.00     | 1.00      |
| MS                             | 2.05            | 1.37     | 1.90      | 1.01     | 0.99     | 0.98      | 3.31     | 1.38     | 2.24      |
| $\alpha(.9)$                   |                 |          |           |          |          |           |          |          |           |
| CS                             | 1.20            | 1.14     | 1.37      | 1.02     | 1.05     | 1.03      | 1.00     | 1.00     | 1.00      |
| MS                             | 1.20            | 1.16     | 1.37      | 1.02     | 1.00     | 0.99      | 1.70     | 1.18     | 1.58      |

Note: Hoshino-Bentler indicates Hoshino and Bentler's (2013) FSR method, Croon FM = Croon's method corrected for correlated uniquenesses at the factor model level, SEM = Structural Equation Modeling (Simultaneous Estimation), with correctly specified unique factor structure, CS = correct structural model specification (*c*' path freely estimated), MS = structural misspecification (*c*' path constrained to 0). All MSE ratios are divided by the MSE for Croon's method corrected for correlated uniquenesses at the measurement model level (Croon MM), i.e.,  $MSE_{Estimator}/MSE_{Croon\_MM}$ .

**Table 21**

Mean square error ratios in Models Correctly Specifying the Unique Factor Structure by Parameter and Simulation Condition, Simulation 1:  $N = 1000$ , 2 Unique Factor Correlations.

| Path:                          | Hoshino-Bentler |          |           | Croon FM |          |           | SEM      |          |           |
|--------------------------------|-----------------|----------|-----------|----------|----------|-----------|----------|----------|-----------|
|                                | <i>a</i>        | <i>b</i> | <i>ab</i> | <i>a</i> | <i>b</i> | <i>ab</i> | <i>a</i> | <i>b</i> | <i>ab</i> |
| Unique Factor Correlation = .1 |                 |          |           |          |          |           |          |          |           |
| $\alpha(.7)$                   |                 |          |           |          |          |           |          |          |           |
| CS                             | 1.27            | 1.10     | 1.38      | 0.99     | 0.99     | 0.98      | 1.00     | 1.00     | 1.00      |
| MS                             | 1.27            | 1.25     | 1.57      | 0.99     | 0.97     | 0.95      | 3.85     | 1.67     | 3.10      |
| $\alpha(.8)$                   |                 |          |           |          |          |           |          |          |           |
| CS                             | 1.11            | 1.07     | 1.19      | 1.00     | 1.00     | 0.99      | 1.00     | 1.00     | 1.00      |
| MS                             | 1.11            | 1.15     | 1.33      | 1.00     | 0.99     | 0.98      | 3.21     | 1.45     | 2.46      |
| $\alpha(.9)$                   |                 |          |           |          |          |           |          |          |           |
| CS                             | 1.01            | 1.02     | 1.05      | 1.00     | 1.00     | 1.00      | 1.00     | 1.00     | 1.00      |
| MS                             | 1.01            | 1.06     | 1.15      | 1.00     | 0.99     | 0.99      | 1.97     | 1.22     | 1.70      |
| Unique Factor Correlation = .3 |                 |          |           |          |          |           |          |          |           |
| $\alpha(.7)$                   |                 |          |           |          |          |           |          |          |           |
| CS                             | 3.72            | 2.14     | 4.86      | 1.01     | 1.05     | 1.02      | 1.00     | 1.00     | 1.00      |
| MS                             | 3.72            | 1.79     | 3.15      | 1.01     | 0.98     | 0.96      | 3.91     | 1.60     | 2.94      |
| $\alpha(.8)$                   |                 |          |           |          |          |           |          |          |           |
| CS                             | 2.00            | 1.67     | 2.73      | 1.00     | 1.04     | 1.03      | 1.00     | 1.00     | 1.00      |
| MS                             | 2.00            | 1.44     | 2.12      | 1.00     | 0.99     | 0.98      | 2.75     | 1.39     | 2.29      |
| $\alpha(.9)$                   |                 |          |           |          |          |           |          |          |           |
| CS                             | 1.33            | 1.14     | 1.48      | 1.00     | 1.01     | 1.01      | 1.00     | 1.00     | 1.00      |
| MS                             | 1.33            | 1.19     | 1.44      | 1.00     | 0.99     | 0.99      | 1.83     | 1.18     | 1.59      |
| Unique Factor Correlation = .5 |                 |          |           |          |          |           |          |          |           |
| $\alpha(.7)$                   |                 |          |           |          |          |           |          |          |           |
| CS                             | 9.13            | 4.24     | 12.18     | 1.04     | 1.10     | 1.07      | 1.00     | 1.00     | 1.00      |
| MS                             | 9.13            | 2.45     | 5.33      | 1.04     | 0.97     | 0.96      | 3.42     | 1.5      | 2.57      |
| $\alpha(.8)$                   |                 |          |           |          |          |           |          |          |           |
| CS                             | 4.08            | 2.39     | 5.53      | 1.00     | 1.09     | 1.06      | 1.00     | 1.00     | 1.00      |
| MS                             | 4.08            | 1.78     | 3.08      | 1.00     | 0.99     | 0.98      | 2.32     | 1.32     | 2.01      |
| $\alpha(.9)$                   |                 |          |           |          |          |           |          |          |           |
| CS                             | 1.93            | 1.44     | 2.32      | 1.01     | 1.04     | 1.03      | 1.00     | 1.00     | 1.00      |
| MS                             | 1.93            | 1.32     | 1.76      | 1.01     | 1.00     | 0.99      | 1.53     | 1.14     | 1.44      |

Note: Hoshino-Bentler indicates Hoshino and Bentler's (2013) FSR method, Croon FM = Croon's method corrected for correlated uniquenesses at the factor model level, SEM = Structural Equation Modeling (Simultaneous Estimation), with correctly specified unique factor structure, CS = correct structural model specification (*c*' path freely estimated), MS = structural misspecification (*c*' path constrained to 0). All MSE ratios are divided by the MSE for Croon's method corrected for correlated uniquenesses at the measurement model level (Croon MM), i.e.,  $MSE_{Estimator}/MSE_{Croon\_MM}$ .

**Table 22**

Percent Bias in Models Omitting the Unique Factor Correlations by Parameter and Simulation Condition, Simulation 2:  
*N* = 250

| Path:                          | Regression FS |               |               | Bartlett FS   |               |               | Croon         |               |               | SEM           |               |               |
|--------------------------------|---------------|---------------|---------------|---------------|---------------|---------------|---------------|---------------|---------------|---------------|---------------|---------------|
|                                | <i>a</i>      | <i>b</i>      | <i>ab</i>     |
| Unique Factor Correlation = .1 |               |               |               |               |               |               |               |               |               |               |               |               |
| $\alpha(.7)$                   |               |               |               |               |               |               |               |               |               |               |               |               |
| CS                             | <b>-32.73</b> | <b>-29.70</b> | <b>-52.65</b> | <b>-32.75</b> | <b>-29.58</b> | <b>-52.63</b> | -6.57         | -5.25         | <b>-11.41</b> | -4.36         | -2.94         | -7.09         |
| MS                             | <b>-32.73</b> | <b>-11.92</b> | <b>-40.42</b> | <b>-32.75</b> | <b>-11.78</b> | <b>-40.38</b> | -6.57         | <b>22.56</b>  | <b>14.97</b>  | 6.98          | <b>34.13</b>  | <b>43.99</b>  |
| $\alpha(.8)$                   |               |               |               |               |               |               |               |               |               |               |               |               |
| CS                             | <b>-21.32</b> | <b>-20.42</b> | <b>-37.37</b> | <b>-21.33</b> | <b>-20.43</b> | <b>-37.41</b> | -2.85         | -3.21         | -5.93         | -1.78         | -2.09         | -3.80         |
| MS                             | <b>-21.32</b> | 1.88          | <b>-19.58</b> | <b>-21.33</b> | 1.87          | <b>-19.61</b> | -2.85         | <b>25.80</b>  | <b>22.51</b>  | 6.73          | <b>33.18</b>  | <b>42.48</b>  |
| $\alpha(.9)$                   |               |               |               |               |               |               |               |               |               |               |               |               |
| CS                             | <b>-11.02</b> | <b>-10.21</b> | <b>-20.06</b> | <b>-11.00</b> | <b>-10.21</b> | <b>-20.06</b> | -1.54         | -0.98         | -2.47         | -1.18         | -0.62         | -1.76         |
| MS                             | <b>-11.02</b> | <b>15.93</b>  | 3.44          | <b>-11.00</b> | <b>15.92</b>  | 3.45          | -1.54         | <b>28.29</b>  | <b>26.60</b>  | 3.62          | 31.77         | <b>36.83</b>  |
| Unique Factor Correlation = .3 |               |               |               |               |               |               |               |               |               |               |               |               |
| $\alpha(.7)$                   |               |               |               |               |               |               |               |               |               |               |               |               |
| CS                             | <b>-38.57</b> | <b>-35.46</b> | <b>-60.30</b> | <b>-38.57</b> | <b>-35.33</b> | <b>-60.25</b> | <b>-19.50</b> | <b>-18.05</b> | <b>-33.98</b> | <b>-15.23</b> | <b>-13.00</b> | <b>-26.18</b> |
| MS                             | <b>-38.57</b> | <b>-20.11</b> | <b>-50.56</b> | <b>-38.57</b> | <b>-19.96</b> | <b>-50.50</b> | <b>-19.50</b> | 4.88          | <b>-15.02</b> | -5.95         | <b>18.66</b>  | <b>12.39</b>  |
| $\alpha(.8)$                   |               |               |               |               |               |               |               |               |               |               |               |               |
| CS                             | <b>-26.16</b> | <b>-23.19</b> | <b>-43.28</b> | <b>-26.11</b> | <b>-23.25</b> | <b>-43.29</b> | <b>-11.36</b> | -9.28         | <b>-19.59</b> | -9.23         | -6.81         | <b>-15.40</b> |
| MS                             | <b>-26.16</b> | -3.20         | <b>-28.26</b> | <b>-26.11</b> | -3.27         | <b>-28.26</b> | <b>-11.36</b> | <b>16.12</b>  | 3.24          | <b>-2.09</b>  | <b>24.38</b>  | <b>22.15</b>  |
| $\alpha(.9)$                   |               |               |               |               |               |               |               |               |               |               |               |               |
| CS                             | <b>-12.93</b> | <b>-12.82</b> | <b>-24.09</b> | <b>-12.96</b> | <b>-12.79</b> | <b>-24.11</b> | -4.63         | -5.03         | -9.46         | -3.95         | -4.20         | -8.02         |
| MS                             | <b>-12.93</b> | <b>12.97</b>  | -1.38         | <b>-12.96</b> | <b>13.00</b>  | -1.39         | -4.63         | <b>23.78</b>  | <b>18.30</b>  | 0.39          | <b>27.58</b>  | <b>28.36</b>  |
| Unique Factor Correlation = .5 |               |               |               |               |               |               |               |               |               |               |               |               |
| $\alpha(.7)$                   |               |               |               |               |               |               |               |               |               |               |               |               |
| CS                             | <b>-47.09</b> | <b>-42.99</b> | <b>-69.87</b> | <b>-47.05</b> | <b>-43.01</b> | <b>-69.85</b> | <b>-36.42</b> | <b>-33.12</b> | <b>-57.56</b> | <b>-33.49</b> | <b>-29.98</b> | <b>-53.48</b> |
| MS                             | <b>-47.09</b> | <b>-31.12</b> | <b>-63.32</b> | <b>-47.05</b> | <b>-31.12</b> | <b>-63.29</b> | <b>-36.42</b> | <b>-17.21</b> | <b>-47.05</b> | <b>-28.65</b> | -9.23         | <b>-34.66</b> |
| $\alpha(.8)$                   |               |               |               |               |               |               |               |               |               |               |               |               |
| CS                             | <b>-32.21</b> | <b>-30.36</b> | <b>-52.82</b> | <b>-32.18</b> | <b>-30.37</b> | <b>-52.81</b> | <b>-22.52</b> | <b>-21.72</b> | <b>-39.40</b> | <b>-20.23</b> | <b>-18.94</b> | <b>-35.38</b> |
| MS                             | <b>-32.21</b> | <b>-12.55</b> | <b>-40.49</b> | <b>-32.18</b> | <b>-12.56</b> | <b>-40.47</b> | <b>-22.52</b> | -0.05         | <b>-22.29</b> | <b>-15.32</b> | 7.18          | -8.83         |
| $\alpha(.9)$                   |               |               |               |               |               |               |               |               |               |               |               |               |
| CS                             | <b>-16.21</b> | <b>-15.90</b> | <b>-29.53</b> | <b>-16.19</b> | <b>-15.91</b> | <b>-29.54</b> | -9.96         | <b>-10.14</b> | <b>-19.12</b> | -8.96         | -8.85         | <b>-17.03</b> |
| MS                             | <b>-16.21</b> | 8.26          | -9.03         | <b>-16.19</b> | 8.24          | -9.03         | -9.96         | <b>16.31</b>  | 5.00          | -5.65         | <b>20.13</b>  | <b>13.65</b>  |

Note: Regression FS = regression FSR method, Bartlett FS = Bartlett FSR method, Croon = Croon's method using the original formulas uncorrected for unique factor correlations, SEM = Structural Equation Modeling (Simultaneous Estimation) under the assumption of conditionally independent uniquenesses, CS = correct structural model specification (*c'* path freely estimated), MS = structural misspecification (*c'* path constrained to 0). Bold entries indicate absolute values of percent bias > 10.

**Table 23**

Percent Bias in Models Correctly Specifying the Unique Factor Structure by Parameter and Simulation Condition, Simulation 2:  $N = 250$

| Path:                          | Hoshino-Bentler |              |              | Croon FM |              |              | Croon MM |              |              | SEM          |              |              |
|--------------------------------|-----------------|--------------|--------------|----------|--------------|--------------|----------|--------------|--------------|--------------|--------------|--------------|
|                                | <i>a</i>        | <i>b</i>     | <i>ab</i>    | <i>a</i> | <i>b</i>     | <i>ab</i>    | <i>a</i> | <i>b</i>     | <i>ab</i>    | <i>a</i>     | <i>b</i>     | <i>ab</i>    |
| Unique Factor Correlation = .1 |                 |              |              |          |              |              |          |              |              |              |              |              |
| $\alpha(.7)$                   |                 |              |              |          |              |              |          |              |              |              |              |              |
| CS                             | -1.04           | 0.25         | -0.65        | -4.74    | -3.91        | -8.34        | -1.04    | 0.25         | -0.65        | -1.04        | 0.25         | -0.65        |
| MS                             | -1.04           | <b>29.72</b> | <b>28.88</b> | -4.74    | <b>24.50</b> | <b>19.13</b> | -1.04    | <b>29.72</b> | <b>28.88</b> | <b>11.73</b> | <b>39.66</b> | <b>56.57</b> |
| $\alpha(.8)$                   |                 |              |              |          |              |              |          |              |              |              |              |              |
| CS                             | 0.14            | -0.13        | 0.05         | -1.69    | -1.86        | -3.48        | 0.14     | -0.13        | 0.05         | 0.14         | -0.13        | 0.05         |
| MS                             | 0.14            | <b>29.73</b> | <b>30.21</b> | -1.69    | <b>27.44</b> | <b>25.60</b> | 0.14     | <b>29.73</b> | <b>30.21</b> | 9.70         | <b>36.63</b> | <b>50.24</b> |
| $\alpha(.9)$                   |                 |              |              |          |              |              |          |              |              |              |              |              |
| CS                             | -0.30           | 0.24         | -0.04        | -0.96    | -0.38        | -1.30        | -0.30    | 0.24         | -0.04        | -0.30        | 0.24         | -0.04        |
| MS                             | -0.30           | <b>29.87</b> | <b>29.75</b> | -0.96    | <b>29.04</b> | <b>28.08</b> | -0.30    | <b>29.87</b> | <b>29.75</b> | 5.02         | <b>33.28</b> | <b>40.27</b> |
| Unique Factor Correlation = .3 |                 |              |              |          |              |              |          |              |              |              |              |              |
| $\alpha(.7)$                   |                 |              |              |          |              |              |          |              |              |              |              |              |
| CS                             | -0.30           | 0.79         | 0.57         | -4.24    | -3.18        | -7.20        | -0.30    | 0.79         | 0.57         | -0.30        | 0.79         | 0.57         |
| MS                             | -0.30           | <b>30.28</b> | <b>30.37</b> | -4.24    | <b>25.11</b> | <b>20.33</b> | -0.30    | <b>30.28</b> | <b>30.37</b> | <b>12.69</b> | <b>40.50</b> | <b>58.91</b> |
| $\alpha(.8)$                   |                 |              |              |          |              |              |          |              |              |              |              |              |
| CS                             | -0.67           | 0.84         | 0.20         | -2.40    | -1.02        | -3.36        | -0.67    | 0.84         | 0.20         | -0.67        | 0.84         | 0.20         |
| MS                             | -0.67           | <b>29.88</b> | <b>29.29</b> | -2.40    | <b>27.46</b> | <b>24.70</b> | -0.67    | <b>29.88</b> | <b>29.29</b> | 9.08         | <b>36.90</b> | <b>49.64</b> |
| $\alpha(.9)$                   |                 |              |              |          |              |              |          |              |              |              |              |              |
| CS                             | -0.05           | -0.63        | -0.71        | -0.74    | -1.30        | -2.04        | -0.05    | -0.63        | -0.71        | -0.05        | -0.63        | -0.71        |
| MS                             | -0.05           | <b>29.53</b> | <b>29.70</b> | -0.74    | <b>28.67</b> | <b>27.97</b> | -0.05    | <b>29.53</b> | <b>29.70</b> | 5.63         | <b>33.22</b> | <b>40.99</b> |
| Unique Factor Correlation = .5 |                 |              |              |          |              |              |          |              |              |              |              |              |
| $\alpha(.7)$                   |                 |              |              |          |              |              |          |              |              |              |              |              |
| CS                             | -0.19           | 1.07         | 1.00         | -4.26    | -3.17        | -7.21        | -0.19    | 1.07         | 1.00         | -0.19        | 1.07         | 1.00         |
| MS                             | -0.19           | <b>29.74</b> | <b>29.93</b> | -4.26    | <b>24.44</b> | <b>19.63</b> | -0.19    | <b>29.74</b> | <b>29.93</b> | <b>12.60</b> | <b>39.85</b> | <b>57.92</b> |
| $\alpha(.8)$                   |                 |              |              |          |              |              |          |              |              |              |              |              |
| CS                             | 0.12            | -0.24        | -0.20        | -1.79    | -2.16        | -4.00        | 0.12     | -0.24        | -0.20        | 0.12         | -0.24        | -0.20        |
| MS                             | 0.12            | <b>29.63</b> | <b>30.02</b> | -1.79    | <b>27.19</b> | <b>25.16</b> | 0.12     | <b>29.63</b> | <b>30.02</b> | <b>10.22</b> | <b>37.07</b> | <b>51.38</b> |
| $\alpha(.9)$                   |                 |              |              |          |              |              |          |              |              |              |              |              |
| CS                             | 0.26            | 0.01         | 0.24         | -0.40    | -0.59        | -1.02        | 0.26     | 0.01         | 0.24         | 0.26         | 0.01         | 0.24         |
| MS                             | 0.26            | <b>29.79</b> | <b>30.36</b> | -0.40    | <b>28.97</b> | <b>28.68</b> | 0.26     | <b>29.79</b> | <b>30.36</b> | 6.05         | <b>33.56</b> | <b>41.90</b> |

Note: Hoshino-Bentler indicates Hoshino and Bentler's (2013) FSR method, Croon FM = Croon's method corrected for correlated uniquenesses at the factor model level, Croon MM = Croon's method corrected for correlated uniquenesses at the measurement model level, SEM = Structural Equation Modeling (Simultaneous Estimation) correctly specifying the correlated residual structure, CS = correct structural model specification (*c*' path freely estimated), MS = structural misspecification (*c*' path constrained to 0). Bold entries indicate absolute values of percent bias > 10.

**Table 24**

Percent Bias in Models Omitting the Unique Factor Correlations by Parameter and Simulation Condition, Simulation 2:  
*N* = 500

| Path:                          | Regression FS |               |               | Bartlett FS   |               |               | Croon         |               |               | SEM           |               |               |
|--------------------------------|---------------|---------------|---------------|---------------|---------------|---------------|---------------|---------------|---------------|---------------|---------------|---------------|
|                                | <i>a</i>      | <i>b</i>      | <i>ab</i>     |
| Unique Factor Correlation = .1 |               |               |               |               |               |               |               |               |               |               |               |               |
| $\alpha(.7)$                   |               |               |               |               |               |               |               |               |               |               |               |               |
| CS                             | <b>-32.12</b> | <b>-29.39</b> | <b>-52.04</b> | <b>-32.15</b> | <b>-29.46</b> | <b>-52.13</b> | -5.03         | -4.49         | -9.22         | -3.77         | -3.18         | -6.75         |
| MS                             | <b>-32.12</b> | <b>-11.38</b> | <b>-39.71</b> | <b>-32.15</b> | <b>-11.48</b> | <b>-39.81</b> | -5.03         | <b>23.84</b>  | <b>17.82</b>  | 7.66          | <b>34.18</b>  | <b>44.71</b>  |
| $\alpha(.8)$                   |               |               |               |               |               |               |               |               |               |               |               |               |
| CS                             | <b>-21.30</b> | <b>-19.81</b> | <b>-36.84</b> | <b>-21.32</b> | <b>-19.75</b> | <b>-36.84</b> | -2.68         | -2.27         | -4.84         | -2.10         | -1.65         | -3.67         |
| MS                             | <b>-21.30</b> | 2.50          | <b>-19.16</b> | <b>-21.32</b> | 2.56          | <b>-19.15</b> | -2.68         | <b>26.83</b>  | <b>23.63</b>  | 6.42          | <b>33.57</b>  | <b>42.36</b>  |
| $\alpha(.9)$                   |               |               |               |               |               |               |               |               |               |               |               |               |
| CS                             | <b>-10.71</b> | <b>-10.39</b> | <b>-19.97</b> | <b>-10.68</b> | <b>-10.41</b> | <b>-19.97</b> | -1.12         | -1.20         | -2.29         | -0.92         | -0.97         | -1.87         |
| MS                             | <b>-10.71</b> | <b>16.13</b>  | 3.82          | <b>-10.68</b> | <b>16.11</b>  | 3.82          | -1.12         | <b>28.59</b>  | <b>27.27</b>  | 3.94          | <b>31.92</b>  | <b>37.23</b>  |
| Unique Factor Correlation = .3 |               |               |               |               |               |               |               |               |               |               |               |               |
| $\alpha(.7)$                   |               |               |               |               |               |               |               |               |               |               |               |               |
| CS                             | <b>-38.08</b> | <b>-34.73</b> | <b>-59.56</b> | <b>-38.13</b> | <b>-34.67</b> | <b>-59.58</b> | <b>-18.58</b> | <b>-16.98</b> | <b>-32.39</b> | <b>-15.07</b> | <b>-12.78</b> | <b>-25.92</b> |
| MS                             | <b>-38.08</b> | <b>-19.17</b> | <b>-49.77</b> | <b>-38.13</b> | <b>-19.10</b> | <b>-49.80</b> | <b>-18.58</b> | 6.38          | <b>-13.14</b> | -5.69         | <b>19.07</b>  | <b>12.64</b>  |
| $\alpha(.8)$                   |               |               |               |               |               |               |               |               |               |               |               |               |
| CS                             | <b>-25.14</b> | <b>-23.77</b> | <b>-42.91</b> | <b>-25.16</b> | <b>-23.78</b> | <b>-42.95</b> | <b>-10.08</b> | <b>-10.09</b> | <b>-19.13</b> | -8.32         | -7.85         | <b>-15.50</b> |
| MS                             | <b>-25.14</b> | -3.05         | <b>-27.27</b> | <b>-25.16</b> | -3.07         | <b>-27.31</b> | <b>-10.08</b> | <b>16.44</b>  | 4.89          | -1.05         | <b>24.43</b>  | <b>23.35</b>  |
| $\alpha(.9)$                   |               |               |               |               |               |               |               |               |               |               |               |               |
| CS                             | <b>-12.80</b> | <b>-12.49</b> | <b>-23.68</b> | <b>-12.79</b> | <b>-12.45</b> | <b>-23.64</b> | -4.42         | -4.54         | -8.75         | -3.91         | -3.91         | -7.66         |
| MS                             | <b>-12.80</b> | <b>13.16</b>  | -1.21         | <b>-12.79</b> | <b>13.21</b>  | -1.15         | -4.42         | <b>24.10</b>  | <b>18.75</b>  | 0.37          | <b>27.63</b>  | <b>28.24</b>  |
| Unique Factor Correlation = .5 |               |               |               |               |               |               |               |               |               |               |               |               |
| $\alpha(.7)$                   |               |               |               |               |               |               |               |               |               |               |               |               |
| CS                             | <b>-46.96</b> | <b>-43.06</b> | <b>-69.77</b> | <b>-46.95</b> | <b>-43.07</b> | <b>-69.77</b> | <b>-35.97</b> | <b>-33.01</b> | <b>-57.07</b> | <b>-33.69</b> | <b>-30.29</b> | <b>-53.71</b> |
| MS                             | <b>-46.96</b> | <b>-31.05</b> | <b>-63.27</b> | <b>-46.95</b> | <b>-31.07</b> | <b>-63.27</b> | <b>-35.97</b> | <b>-16.77</b> | <b>-46.48</b> | <b>-28.86</b> | -9.47         | <b>-35.22</b> |
| $\alpha(.8)$                   |               |               |               |               |               |               |               |               |               |               |               |               |
| CS                             | <b>-32.63</b> | <b>-29.95</b> | <b>-52.75</b> | <b>-32.64</b> | <b>-29.95</b> | <b>-52.77</b> | <b>-22.82</b> | <b>-21.12</b> | <b>-39.06</b> | <b>-20.83</b> | <b>-18.68</b> | <b>-35.55</b> |
| MS                             | <b>-32.63</b> | <b>-12.19</b> | <b>-40.67</b> | <b>-32.64</b> | <b>-12.21</b> | <b>-40.69</b> | <b>-22.82</b> | 0.57          | <b>-22.17</b> | <b>-15.87</b> | 7.36          | -9.41         |
| $\alpha(.9)$                   |               |               |               |               |               |               |               |               |               |               |               |               |
| CS                             | <b>-16.53</b> | <b>-15.99</b> | <b>-29.88</b> | <b>-16.51</b> | <b>-15.99</b> | <b>-29.87</b> | <b>-10.20</b> | <b>-10.17</b> | <b>-19.34</b> | -9.33         | -8.97         | <b>-17.47</b> |
| MS                             | <b>-16.53</b> | 8.22          | -9.55         | <b>-16.51</b> | 8.22          | -9.53         | <b>-10.20</b> | <b>16.43</b>  | 4.67          | -5.99         | <b>20.12</b>  | <b>13.06</b>  |

Note: Regression FS = regression FSR method, Bartlett FS = Bartlett FSR method, Croon = Croon's method using the original formulas uncorrected for unique factor correlations, SEM = Structural Equation Modeling (Simultaneous Estimation) under the assumption of conditionally independent uniquenesses, CS = correct structural model specification (*c'* path freely estimated), MS = structural misspecification (*c'* path constrained to 0). Bold entries indicate absolute values of percent bias > 10.



**Table 25**

Percent Bias in Models Correctly Specifying the Unique Factor Structure by Parameter and Simulation Condition, Simulation 2:  $N = 500$

| Path:                          | Hoshino-Bentler |              |              | Croon FM |              |              | Croon MM |              |              | SEM          |              |              |
|--------------------------------|-----------------|--------------|--------------|----------|--------------|--------------|----------|--------------|--------------|--------------|--------------|--------------|
|                                | <i>a</i>        | <i>b</i>     | <i>ab</i>    | <i>a</i> | <i>b</i>     | <i>ab</i>    | <i>a</i> | <i>b</i>     | <i>ab</i>    | <i>a</i>     | <i>b</i>     | <i>ab</i>    |
| Unique Factor Correlation = .1 |                 |              |              |          |              |              |          |              |              |              |              |              |
| $\alpha(.7)$                   |                 |              |              |          |              |              |          |              |              |              |              |              |
| CS                             | -0.51           | -0.04        | -0.46        | -2.39    | -1.81        | -4.07        | -0.51    | -0.04        | -0.46        | -0.51        | -0.04        | -0.46        |
| MS                             | -0.51           | <b>29.85</b> | <b>29.40</b> | -2.39    | <b>27.48</b> | <b>24.66</b> | -0.51    | <b>29.85</b> | <b>29.40</b> | <b>12.31</b> | <b>39.83</b> | <b>57.30</b> |
| $\alpha(.8)$                   |                 |              |              |          |              |              |          |              |              |              |              |              |
| CS                             | -0.14           | 0.32         | 0.21         | -1.02    | -0.55        | -1.53        | -0.14    | 0.32         | 0.21         | -0.14        | 0.32         | 0.21         |
| MS                             | -0.14           | <b>30.18</b> | <b>30.18</b> | -1.02    | <b>29.04</b> | <b>27.91</b> | -0.14    | <b>30.18</b> | <b>30.18</b> | 9.43         | <b>37.06</b> | <b>50.19</b> |
| $\alpha(.9)$                   |                 |              |              |          |              |              |          |              |              |              |              |              |
| CS                             | -0.04           | -0.09        | -0.11        | -0.37    | -0.44        | -0.80        | -0.04    | -0.09        | -0.11        | -0.04        | -0.09        | -0.11        |
| MS                             | -0.04           | <b>30.02</b> | <b>30.08</b> | -0.37    | <b>29.59</b> | <b>29.22</b> | -0.04    | <b>30.02</b> | <b>30.08</b> | 5.35         | <b>33.48</b> | <b>40.74</b> |
| Unique Factor Correlation = .3 |                 |              |              |          |              |              |          |              |              |              |              |              |
| $\alpha(.7)$                   |                 |              |              |          |              |              |          |              |              |              |              |              |
| CS                             | -0.23           | 0.69         | 0.44         | -2.11    | -1.37        | -3.46        | -0.23    | 0.69         | 0.44         | -0.23        | 0.69         | 0.44         |
| MS                             | -0.23           | <b>30.41</b> | <b>30.31</b> | -2.11    | <b>27.83</b> | <b>25.35</b> | -0.23    | <b>30.41</b> | <b>30.31</b> | <b>12.77</b> | <b>40.60</b> | <b>58.79</b> |
| $\alpha(.8)$                   |                 |              |              |          |              |              |          |              |              |              |              |              |
| CS                             | 0.17            | 0.02         | 0.19         | -0.72    | -0.92        | -1.64        | 0.17     | 0.02         | 0.19         | 0.17         | 0.02         | 0.19         |
| MS                             | 0.17            | <b>29.91</b> | <b>30.28</b> | -0.72    | <b>28.71</b> | <b>27.93</b> | 0.17     | <b>29.91</b> | <b>30.28</b> | <b>10.05</b> | <b>37.07</b> | <b>51.01</b> |
| $\alpha(.9)$                   |                 |              |              |          |              |              |          |              |              |              |              |              |
| CS                             | -0.20           | -0.43        | -0.63        | -0.52    | -0.74        | -1.26        | -0.20    | -0.43        | -0.63        | -0.20        | -0.43        | -0.63        |
| MS                             | -0.20           | <b>29.56</b> | <b>29.40</b> | -0.52    | <b>29.15</b> | <b>28.59</b> | -0.20    | <b>29.56</b> | <b>29.40</b> | <b>5.41</b>  | <b>33.19</b> | <b>40.53</b> |
| Unique Factor Correlation = .5 |                 |              |              |          |              |              |          |              |              |              |              |              |
| $\alpha(.7)$                   |                 |              |              |          |              |              |          |              |              |              |              |              |
| CS                             | -0.34           | 0.75         | 0.45         | -2.32    | -1.33        | -3.55        | -0.34    | 0.75         | 0.45         | -0.34        | 0.75         | 0.45         |
| MS                             | -0.34           | <b>30.04</b> | <b>29.80</b> | -2.32    | <b>27.46</b> | <b>24.74</b> | -0.34    | <b>30.04</b> | <b>29.80</b> | <b>12.70</b> | <b>40.31</b> | <b>58.35</b> |
| $\alpha(.8)$                   |                 |              |              |          |              |              |          |              |              |              |              |              |
| CS                             | -0.29           | -0.15        | -0.35        | -1.16    | -1.05        | -2.13        | -0.29    | -0.15        | -0.35        | -0.29        | -0.15        | -0.35        |
| MS                             | -0.29           | <b>29.78</b> | <b>29.59</b> | -1.16    | <b>28.62</b> | <b>27.32</b> | -0.29    | <b>29.78</b> | <b>29.59</b> | 9.98         | <b>37.25</b> | <b>51.15</b> |
| $\alpha(.9)$                   |                 |              |              |          |              |              |          |              |              |              |              |              |
| CS                             | -0.27           | -0.34        | -0.62        | -0.59    | -0.68        | -1.28        | -0.27    | -0.34        | -0.62        | -0.27        | -0.34        | -0.62        |
| MS                             | -0.27           | <b>29.78</b> | <b>29.54</b> | -0.59    | <b>29.34</b> | <b>28.68</b> | -0.27    | <b>29.78</b> | <b>29.54</b> | 5.63         | <b>33.61</b> | <b>41.25</b> |

Note: Hoshino-Bentler indicates Hoshino and Bentler's (2013) FSR method, Croon FM = Croon's method corrected for correlated uniquenesses at the factor model level, Croon MM = Croon's method corrected for correlated uniquenesses at the measurement model level, SEM = Structural Equation Modeling (Simultaneous Estimation) correctly specifying the correlated residual structure, CS = correct structural model specification ( $c'$  path freely estimated), MS = structural misspecification ( $c'$  path constrained to 0). Bold entries indicate absolute values of percent bias > 10.

**Table 26**

Percent Bias in Models Omitting the Unique Factor Correlations by Parameter and Simulation Condition, Simulation 2:  
*N* = 1000

| Path:                          | Regression FS |               |               | Bartlett FS   |               |               | Croon         |               |               | SEM           |               |               |
|--------------------------------|---------------|---------------|---------------|---------------|---------------|---------------|---------------|---------------|---------------|---------------|---------------|---------------|
|                                | <i>a</i>      | <i>b</i>      | <i>ab</i>     |
| Unique Factor Correlation = .1 |               |               |               |               |               |               |               |               |               |               |               |               |
| $\alpha(.7)$                   |               |               |               |               |               |               |               |               |               |               |               |               |
| CS                             | <b>-31.70</b> | <b>-29.01</b> | <b>-51.52</b> | <b>-31.87</b> | <b>-28.97</b> | <b>-51.63</b> | -4.43         | -3.82         | -8.09         | -3.60         | -2.88         | -6.39         |
| MS                             | <b>-31.70</b> | <b>-11.00</b> | <b>-39.14</b> | <b>-31.87</b> | <b>-10.95</b> | <b>-39.27</b> | -4.43         | <b>24.61</b>  | <b>19.19</b>  | 7.63          | <b>34.24</b>  | <b>44.60</b>  |
| $\alpha(.8)$                   |               |               |               |               |               |               |               |               |               |               |               |               |
| CS                             | <b>-21.20</b> | <b>-19.79</b> | <b>-36.78</b> | <b>-21.28</b> | <b>-19.66</b> | <b>-36.76</b> | -2.49         | -2.19         | -4.60         | -2.12         | -1.77         | -3.83         |
| MS                             | <b>-21.20</b> | 2.58          | <b>-19.09</b> | <b>-21.28</b> | 2.74          | <b>-19.06</b> | -2.49         | <b>27.14</b>  | <b>24.06</b>  | 6.44          | <b>33.62</b>  | <b>42.31</b>  |
| $\alpha(.9)$                   |               |               |               |               |               |               |               |               |               |               |               |               |
| CS                             | <b>-10.60</b> | <b>-10.09</b> | <b>-19.60</b> | <b>-10.61</b> | <b>-10.08</b> | <b>-19.61</b> | -0.97         | -0.83         | -1.77         | -0.86         | -0.70         | -1.53         |
| MS                             | <b>-10.60</b> | <b>16.32</b>  | 4.07          | <b>-10.61</b> | <b>16.33</b>  | 4.05          | -0.97         | <b>28.85</b>  | <b>27.67</b>  | 3.97          | <b>32.04</b>  | <b>37.35</b>  |
| Unique Factor Correlation = .3 |               |               |               |               |               |               |               |               |               |               |               |               |
| $\alpha(.7)$                   |               |               |               |               |               |               |               |               |               |               |               |               |
| CS                             | <b>-37.99</b> | <b>-34.88</b> | <b>-59.61</b> | <b>-38.00</b> | <b>-34.95</b> | <b>-59.66</b> | <b>-18.22</b> | <b>-17.14</b> | <b>-32.23</b> | <b>-14.96</b> | <b>-13.26</b> | <b>-26.23</b> |
| MS                             | <b>-37.99</b> | <b>-19.30</b> | <b>-49.88</b> | <b>-38.00</b> | <b>-19.39</b> | <b>-49.95</b> | <b>-18.22</b> | 6.32          | <b>-12.94</b> | -5.64         | <b>18.55</b>  | <b>12.04</b>  |
| $\alpha(.8)$                   |               |               |               |               |               |               |               |               |               |               |               |               |
| CS                             | <b>-25.45</b> | <b>-23.84</b> | <b>-43.21</b> | <b>-25.47</b> | <b>-23.79</b> | <b>-43.19</b> | <b>-10.33</b> | <b>-10.05</b> | <b>-19.33</b> | -8.76         | -8.06         | <b>-16.10</b> |
| MS                             | <b>-25.45</b> | -3.12         | <b>-27.69</b> | <b>-25.47</b> | -3.06         | <b>-27.67</b> | <b>-10.33</b> | <b>16.61</b>  | 4.67          | -1.43         | <b>24.34</b>  | <b>22.69</b>  |
| $\alpha(.9)$                   |               |               |               |               |               |               |               |               |               |               |               |               |
| CS                             | <b>-12.52</b> | <b>-11.85</b> | <b>-22.89</b> | <b>-12.54</b> | <b>-11.83</b> | <b>-22.89</b> | -4.10         | -3.85         | -7.80         | -3.65         | -3.26         | -6.80         |
| MS                             | <b>-12.52</b> | <b>13.82</b>  | -0.37         | <b>-12.54</b> | <b>13.84</b>  | -0.38         | -4.10         | <b>24.80</b>  | <b>19.73</b>  | 0.64          | <b>28.25</b>  | <b>29.14</b>  |
| Unique Factor Correlation = .5 |               |               |               |               |               |               |               |               |               |               |               |               |
| $\alpha(.7)$                   |               |               |               |               |               |               |               |               |               |               |               |               |
| CS                             | <b>-46.62</b> | <b>-42.88</b> | <b>-69.48</b> | <b>-46.70</b> | <b>-42.83</b> | <b>-69.50</b> | <b>-35.52</b> | <b>-32.77</b> | <b>-56.62</b> | <b>-33.50</b> | <b>-30.38</b> | <b>-53.67</b> |
| MS                             | <b>-46.62</b> | <b>-30.68</b> | <b>-62.90</b> | <b>-46.70</b> | <b>-30.63</b> | <b>-62.93</b> | <b>-35.52</b> | <b>-16.21</b> | <b>-45.84</b> | <b>-28.69</b> | -9.35         | <b>-35.15</b> |
| $\alpha(.8)$                   |               |               |               |               |               |               |               |               |               |               |               |               |
| CS                             | <b>-32.37</b> | <b>-29.84</b> | <b>-52.55</b> | <b>-32.40</b> | <b>-29.82</b> | <b>-52.56</b> | <b>-22.50</b> | <b>-20.97</b> | <b>-38.76</b> | <b>-20.70</b> | <b>-18.68</b> | <b>-35.51</b> |
| MS                             | <b>-32.37</b> | <b>-12.03</b> | <b>-40.43</b> | <b>-32.40</b> | <b>-12.01</b> | <b>-40.45</b> | <b>-22.50</b> | 0.82          | <b>-21.78</b> | <b>-15.82</b> | 7.35          | -9.50         |
| $\alpha(.9)$                   |               |               |               |               |               |               |               |               |               |               |               |               |
| CS                             | <b>-16.65</b> | <b>-15.90</b> | <b>-29.89</b> | <b>-16.64</b> | <b>-15.90</b> | <b>-29.88</b> | <b>-10.32</b> | <b>-10.08</b> | <b>-19.34</b> | -9.50         | -8.95         | <b>-17.58</b> |
| MS                             | <b>-16.65</b> | 8.29          | -9.67         | <b>-16.64</b> | 8.28          | -9.66         | <b>-10.32</b> | <b>16.51</b>  | 4.56          | -6.15         | <b>20.10</b>  | <b>12.79</b>  |

Note: Regression FS = regression FSR method, Bartlett FS = Bartlett FSR method, Croon = Croon's method using the original formulas uncorrected for unique factor correlations, SEM = Structural Equation Modeling (Simultaneous Estimation) under the assumption of conditionally independent uniquenesses, CS = correct structural model specification (*c'* path freely estimated), MS = structural misspecification (*c'* path constrained to 0). Bold entries indicate absolute values of percent bias > 10.

**Table 27**

Percent Bias in Models Correctly Specifying the Unique Factor Structure by Parameter and Simulation Condition, Simulation 2:  $N = 1000$

| Path:                          | Hoshino-Bentler |              |              | Croon FM |              |              | Croon MM |              |              | SEM          |              |              |
|--------------------------------|-----------------|--------------|--------------|----------|--------------|--------------|----------|--------------|--------------|--------------|--------------|--------------|
|                                | <i>a</i>        | <i>b</i>     | <i>ab</i>    | <i>a</i> | <i>b</i>     | <i>ab</i>    | <i>a</i> | <i>b</i>     | <i>ab</i>    | <i>a</i>     | <i>b</i>     | <i>ab</i>    |
| Unique Factor Correlation = .1 |                 |              |              |          |              |              |          |              |              |              |              |              |
| $\alpha(.7)$                   |                 |              |              |          |              |              |          |              |              |              |              |              |
| CS                             | -0.32           | 0.30         | -0.02        | -1.19    | -0.56        | -1.74        | -0.32    | 0.30         | -0.02        | -0.32        | 0.30         | -0.02        |
| MS                             | -0.32           | <b>30.06</b> | <b>29.76</b> | -1.19    | <b>28.91</b> | <b>27.49</b> | -0.32    | <b>30.06</b> | <b>29.76</b> | <b>12.27</b> | <b>39.84</b> | <b>57.12</b> |
| $\alpha(.8)$                   |                 |              |              |          |              |              |          |              |              |              |              |              |
| CS                             | -0.17           | 0.14         | 0.00         | -0.63    | -0.34        | -0.95        | -0.17    | 0.14         | 0.00         | -0.17        | 0.14         | 0.00         |
| MS                             | -0.17           | <b>30.17</b> | <b>30.04</b> | -0.63    | <b>29.56</b> | <b>28.82</b> | -0.17    | <b>30.17</b> | <b>30.04</b> | 9.47         | <b>37.07</b> | <b>50.15</b> |
| $\alpha(.9)$                   |                 |              |              |          |              |              |          |              |              |              |              |              |
| CS                             | 0.00            | 0.18         | 0.21         | -0.16    | 0.01         | -0.12        | 0.00     | 0.18         | 0.21         | 0.00         | 0.18         | 0.21         |
| MS                             | 0.00            | <b>30.15</b> | <b>30.23</b> | -0.16    | <b>29.94</b> | <b>29.81</b> | 0.00     | <b>30.15</b> | <b>30.23</b> | 5.36         | <b>33.57</b> | <b>40.81</b> |
| Unique Factor Correlation = .3 |                 |              |              |          |              |              |          |              |              |              |              |              |
| $\alpha(.7)$                   |                 |              |              |          |              |              |          |              |              |              |              |              |
| CS                             | -0.04           | 0.10         | 0.07         | -0.98    | -0.81        | -1.77        | -0.04    | 0.10         | 0.07         | -0.04        | 0.10         | 0.07         |
| MS                             | -0.04           | <b>29.92</b> | <b>29.97</b> | -0.98    | <b>28.72</b> | <b>27.56</b> | -0.04    | <b>29.92</b> | <b>29.97</b> | <b>12.90</b> | <b>40.05</b> | <b>58.24</b> |
| $\alpha(.8)$                   |                 |              |              |          |              |              |          |              |              |              |              |              |
| CS                             | -0.42           | -0.43        | -0.83        | -0.86    | -0.89        | -1.74        | -0.42    | -0.43        | -0.83        | -0.42        | -0.43        | -0.83        |
| MS                             | -0.42           | <b>29.63</b> | <b>29.18</b> | -0.86    | <b>29.04</b> | <b>28.03</b> | -0.42    | <b>29.63</b> | <b>29.18</b> | 9.53         | <b>36.83</b> | <b>49.97</b> |
| $\alpha(.9)$                   |                 |              |              |          |              |              |          |              |              |              |              |              |
| CS                             | 0.14            | 0.21         | 0.35         | -0.03    | 0.05         | 0.02         | 0.14     | 0.21         | 0.35         | 0.14         | 0.21         | 0.35         |
| MS                             | 0.14            | <b>30.22</b> | <b>30.46</b> | -0.03    | <b>30.01</b> | <b>30.03</b> | 0.14     | <b>30.22</b> | <b>30.46</b> | 5.76         | <b>33.83</b> | <b>41.61</b> |
| Unique Factor Correlation = .5 |                 |              |              |          |              |              |          |              |              |              |              |              |
| $\alpha(.7)$                   |                 |              |              |          |              |              |          |              |              |              |              |              |
| CS                             | -0.18           | -0.19        | -0.33        | -1.10    | -1.12        | -2.17        | -0.18    | -0.19        | -0.33        | -0.18        | -0.19        | -0.33        |
| MS                             | -0.18           | <b>29.85</b> | <b>29.75</b> | -1.10    | <b>28.59</b> | <b>27.31</b> | -0.18    | <b>29.85</b> | <b>29.75</b> | <b>13.07</b> | <b>40.31</b> | <b>58.80</b> |
| $\alpha(.8)$                   |                 |              |              |          |              |              |          |              |              |              |              |              |
| CS                             | -0.27           | -0.10        | -0.37        | -0.72    | -0.53        | -1.26        | -0.27    | -0.10        | -0.37        | -0.27        | -0.10        | -0.37        |
| MS                             | -0.27           | <b>29.84</b> | <b>29.56</b> | -0.72    | <b>29.25</b> | <b>28.39</b> | -0.27    | <b>29.84</b> | <b>29.56</b> | 9.97         | <b>37.27</b> | <b>51.04</b> |
| $\alpha(.9)$                   |                 |              |              |          |              |              |          |              |              |              |              |              |
| CS                             | -0.12           | -0.18        | -0.29        | -0.28    | -0.32        | -0.60        | -0.12    | -0.18        | -0.29        | -0.12        | -0.18        | -0.29        |
| MS                             | -0.12           | <b>29.76</b> | <b>29.67</b> | -0.28    | <b>29.55</b> | <b>29.25</b> | -0.12    | <b>29.76</b> | <b>29.67</b> | 5.74         | <b>33.56</b> | <b>41.30</b> |

Note: Hoshino-Bentler indicates Hoshino and Bentler's (2013) FSR method, Croon FM = Croon's method corrected for correlated uniquenesses at the factor model level, Croon MM = Croon's method corrected for correlated uniquenesses at the measurement model level, SEM = Structural Equation Modeling (Simultaneous Estimation) correctly specifying the correlated residual structure, CS = correct structural model specification ( $c'$  path freely estimated), MS = structural misspecification ( $c'$  path constrained to 0). Bold entries indicate absolute values of percent bias > 10.

**Table 28**

Mean square error ratios in Models Correctly Specifying the Unique Factor Structure by Parameter and Simulation Condition, Simulation 2:  $N = 250$ .

| Path:                          | Hoshino-Bentler |          |           | Croon FM |          |           | SEM      |          |           |
|--------------------------------|-----------------|----------|-----------|----------|----------|-----------|----------|----------|-----------|
|                                | <i>a</i>        | <i>b</i> | <i>ab</i> | <i>a</i> | <i>b</i> | <i>ab</i> | <i>a</i> | <i>b</i> | <i>ab</i> |
| Unique Factor Correlation = .1 |                 |          |           |          |          |           |          |          |           |
| $\alpha(.7)$                   |                 |          |           |          |          |           |          |          |           |
| CS                             | 1.00            | 1.00     | 1.00      | 1.09     | 1.00     | 0.99      | 1.00     | 1.00     | 1.00      |
| MS                             | 1.00            | 1.00     | 1.00      | 1.09     | 0.74     | 0.65      | 1.57     | 1.65     | 2.69      |
| $\alpha(.8)$                   |                 |          |           |          |          |           |          |          |           |
| CS                             | 1.00            | 1.00     | 1.00      | 1.00     | 0.98     | 0.97      | 1.00     | 1.00     | 1.00      |
| MS                             | 1.00            | 1.00     | 1.00      | 1.00     | 0.87     | 0.79      | 1.59     | 1.47     | 2.26      |
| $\alpha(.9)$                   |                 |          |           |          |          |           |          |          |           |
| CS                             | 1.00            | 1.00     | 1.00      | 1.01     | 0.98     | 0.99      | 1.00     | 1.00     | 1.00      |
| MS                             | 1.00            | 1.00     | 1.00      | 1.01     | 0.95     | 0.92      | 1.21     | 1.22     | 1.64      |
| Unique Factor Correlation = .3 |                 |          |           |          |          |           |          |          |           |
| $\alpha(.7)$                   |                 |          |           |          |          |           |          |          |           |
| CS                             | 1.00            | 1.00     | 1.00      | 1.07     | 0.94     | 0.94      | 1.00     | 1.00     | 1.00      |
| MS                             | 1.00            | 1.00     | 1.00      | 1.07     | 0.74     | 0.64      | 1.69     | 1.67     | 2.71      |
| $\alpha(.8)$                   |                 |          |           |          |          |           |          |          |           |
| CS                             | 1.00            | 1.00     | 1.00      | 1.04     | 0.95     | 0.96      | 1.00     | 1.00     | 1.00      |
| MS                             | 1.00            | 1.00     | 1.00      | 1.04     | 0.86     | 0.80      | 1.49     | 1.47     | 2.31      |
| $\alpha(.9)$                   |                 |          |           |          |          |           |          |          |           |
| CS                             | 1.00            | 1.00     | 1.00      | 1.00     | 1.00     | 1.00      | 1.00     | 1.00     | 1.00      |
| MS                             | 1.00            | 1.00     | 1.00      | 1.00     | 0.95     | 0.91      | 1.28     | 1.25     | 1.7       |
| Unique Factor Correlation = .5 |                 |          |           |          |          |           |          |          |           |
| $\alpha(.7)$                   |                 |          |           |          |          |           |          |          |           |
| CS                             | 1.00            | 1.00     | 1.00      | 1.05     | 0.90     | 0.88      | 1.00     | 1.00     | 1.00      |
| MS                             | 1.00            | 1.00     | 1.00      | 1.05     | 0.73     | 0.64      | 1.53     | 1.66     | 2.59      |
| $\alpha(.8)$                   |                 |          |           |          |          |           |          |          |           |
| CS                             | 1.00            | 1.00     | 1.00      | 1.01     | 0.98     | 0.97      | 1.00     | 1.00     | 1.00      |
| MS                             | 1.00            | 1.00     | 1.00      | 1.01     | 0.86     | 0.78      | 1.62     | 1.50     | 2.37      |
| $\alpha(.9)$                   |                 |          |           |          |          |           |          |          |           |
| CS                             | 1.00            | 1.00     | 1.00      | 1.00     | 0.99     | 0.99      | 1.00     | 1.00     | 1.00      |
| MS                             | 1.00            | 1.00     | 1.00      | 1.00     | 0.95     | 0.92      | 1.31     | 1.25     | 1.71      |

Note: Hoshino-Bentler indicates Hoshino and Bentler's (2013) FSR method, Croon FM = Croon's method corrected for correlated uniquenesses at the factor model level, SEM = Structural Equation Modeling (Simultaneous Estimation), with correctly specified unique factor structure, CS = correct structural model specification (*c'* path freely estimated), MS = structural misspecification (*c'* path constrained to 0). All MSE ratios are divided by the MSE for Croon's method corrected for correlated uniquenesses at the measurement model level (Croon MM), i.e.,  $MSE_{Estimator}/MSE_{Croon\_MM}$ .

**Table 29**

Mean square error ratios in Models Correctly Specifying the Unique Factor Structure by Parameter and Simulation Condition, Simulation 2:  $N = 500$ .

| Path:                          | Hoshino-Bentler |          |           | Croon FM |          |           | SEM      |          |           |
|--------------------------------|-----------------|----------|-----------|----------|----------|-----------|----------|----------|-----------|
|                                | <i>a</i>        | <i>b</i> | <i>ab</i> | <i>a</i> | <i>b</i> | <i>ab</i> | <i>a</i> | <i>b</i> | <i>ab</i> |
| Unique Factor Correlation = .1 |                 |          |           |          |          |           |          |          |           |
| $\alpha(.7)$                   |                 |          |           |          |          |           |          |          |           |
| CS                             | 1.00            | 1.00     | 1.00      | 1.07     | 1.01     | 1.02      | 1.00     | 1.00     | 1.00      |
| MS                             | 1.00            | 1.00     | 1.00      | 1.07     | 0.87     | 0.78      | 2.52     | 1.72     | 3.14      |
| $\alpha(.8)$                   |                 |          |           |          |          |           |          |          |           |
| CS                             | 1.00            | 1.00     | 1.00      | 1.02     | 0.99     | 0.99      | 1.00     | 1.00     | 1.00      |
| MS                             | 1.00            | 1.00     | 1.00      | 1.02     | 0.93     | 0.88      | 2.19     | 1.48     | 2.46      |
| $\alpha(.9)$                   |                 |          |           |          |          |           |          |          |           |
| CS                             | 1.00            | 1.00     | 1.00      | 1.00     | 1.00     | 0.99      | 1.00     | 1.00     | 1.00      |
| MS                             | 1.00            | 1.00     | 1.00      | 1.00     | 0.97     | 0.95      | 1.63     | 1.24     | 1.74      |
| Unique Factor Correlation = .3 |                 |          |           |          |          |           |          |          |           |
| $\alpha(.7)$                   |                 |          |           |          |          |           |          |          |           |
| CS                             | 1.00            | 1.00     | 1.00      | 1.03     | 1.00     | 1.00      | 1.00     | 1.00     | 1.00      |
| MS                             | 1.00            | 1.00     | 1.00      | 1.03     | 0.85     | 0.77      | 2.41     | 1.71     | 3.08      |
| $\alpha(.8)$                   |                 |          |           |          |          |           |          |          |           |
| CS                             | 1.00            | 1.00     | 1.00      | 1.01     | 1.00     | 0.99      | 1.00     | 1.00     | 1.00      |
| MS                             | 1.00            | 1.00     | 1.00      | 1.01     | 0.93     | 0.88      | 2.44     | 1.50     | 2.53      |
| $\alpha(.9)$                   |                 |          |           |          |          |           |          |          |           |
| CS                             | 1.00            | 1.00     | 1.00      | 1.00     | 1.00     | 1.00      | 1.00     | 1.00     | 1.00      |
| MS                             | 1.00            | 1.00     | 1.00      | 1.00     | 0.97     | 0.95      | 1.63     | 1.25     | 1.79      |
| Unique Factor Correlation = .5 |                 |          |           |          |          |           |          |          |           |
| $\alpha(.7)$                   |                 |          |           |          |          |           |          |          |           |
| CS                             | 1.00            | 1.00     | 1.00      | 1.04     | 0.96     | 0.97      | 1.00     | 1.00     | 1.00      |
| MS                             | 1.00            | 1.00     | 1.00      | 1.04     | 0.85     | 0.77      | 2.30     | 1.72     | 3.10      |
| $\alpha(.8)$                   |                 |          |           |          |          |           |          |          |           |
| CS                             | 1.00            | 1.00     | 1.00      | 1.02     | 0.99     | 0.98      | 1.00     | 1.00     | 1.00      |
| MS                             | 1.00            | 1.00     | 1.00      | 1.02     | 0.93     | 0.88      | 2.28     | 1.53     | 2.61      |
| $\alpha(.9)$                   |                 |          |           |          |          |           |          |          |           |
| CS                             | 1.00            | 1.00     | 1.00      | 1.01     | 0.99     | 1.00      | 1.00     | 1.00     | 1.00      |
| MS                             | 1.00            | 1.00     | 1.00      | 1.01     | 0.97     | 0.95      | 1.68     | 1.26     | 1.84      |

Note: Hoshino-Bentler indicates Hoshino and Bentler's (2013) FSR method, Croon FM = Croon's method corrected for correlated uniquenesses at the factor model level, SEM = Structural Equation Modeling (Simultaneous Estimation), with correctly specified unique factor structure, CS = correct structural model specification (*c'* path freely estimated), MS = structural misspecification (*c'* path constrained to 0). All MSE ratios are divided by the MSE for Croon's method corrected for correlated uniquenesses at the measurement model level (Croon MM), i.e.,  $MSE_{Estimator}/MSE_{Croon\_MM}$ .

**Table 30**

Mean square error ratios in Models Correctly Specifying the Unique Factor Structure by Parameter and Simulation Condition, Simulation 2:  $N = 1000$ .

| Path:                          | Hoshino-Bentler |          |           | Croon FM |          |           | SEM      |          |           |
|--------------------------------|-----------------|----------|-----------|----------|----------|-----------|----------|----------|-----------|
|                                | <i>a</i>        | <i>b</i> | <i>ab</i> | <i>a</i> | <i>b</i> | <i>ab</i> | <i>a</i> | <i>b</i> | <i>ab</i> |
| Unique Factor Correlation = .1 |                 |          |           |          |          |           |          |          |           |
| $\alpha(.7)$                   |                 |          |           |          |          |           |          |          |           |
| CS                             | 1.00            | 1.00     | 1.00      | 1.02     | 1.01     | 1.02      | 1.00     | 1.00     | 1.00      |
| MS                             | 1.00            | 1.00     | 1.00      | 1.02     | 0.93     | 0.87      | 3.77     | 1.73     | 3.32      |
| $\alpha(.8)$                   |                 |          |           |          |          |           |          |          |           |
| CS                             | 1.00            | 1.00     | 1.00      | 1.02     | 1.00     | 1.00      | 1.00     | 1.00     | 1.00      |
| MS                             | 1.00            | 1.00     | 1.00      | 1.02     | 0.96     | 0.93      | 3.63     | 1.50     | 2.62      |
| $\alpha(.9)$                   |                 |          |           |          |          |           |          |          |           |
| CS                             | 1.00            | 1.00     | 1.00      | 1.00     | 1.00     | 0.99      | 1.00     | 1.00     | 1.00      |
| MS                             | 1.00            | 1.00     | 1.00      | 1.00     | 0.99     | 0.97      | 2.28     | 1.24     | 1.77      |
| Unique Factor Correlation = .3 |                 |          |           |          |          |           |          |          |           |
| $\alpha(.7)$                   |                 |          |           |          |          |           |          |          |           |
| CS                             | 1.00            | 1.00     | 1.00      | 1.02     | 0.98     | 0.98      | 1.00     | 1.00     | 1.00      |
| MS                             | 1.00            | 1.00     | 1.00      | 1.02     | 0.92     | 0.87      | 4.11     | 1.76     | 3.4       |
| $\alpha(.8)$                   |                 |          |           |          |          |           |          |          |           |
| CS                             | 1.00            | 1.00     | 1.00      | 1.01     | 1.00     | 1.01      | 1.00     | 1.00     | 1.00      |
| MS                             | 1.00            | 1.00     | 1.00      | 1.01     | 0.96     | 0.93      | 3.37     | 1.53     | 2.72      |
| $\alpha(.9)$                   |                 |          |           |          |          |           |          |          |           |
| CS                             | 1.00            | 1.00     | 1.00      | 1.00     | 1.00     | 0.99      | 1.00     | 1.00     | 1.00      |
| MS                             | 1.00            | 1.00     | 1.00      | 1.00     | 0.99     | 0.97      | 2.43     | 1.25     | 1.81      |
| Unique Factor Correlation = .5 |                 |          |           |          |          |           |          |          |           |
| $\alpha(.7)$                   |                 |          |           |          |          |           |          |          |           |
| CS                             | 1.00            | 1.00     | 1.00      | 1.03     | 0.99     | 1.00      | 1.00     | 1.00     | 1.00      |
| MS                             | 1.00            | 1.00     | 1.00      | 1.03     | 0.92     | 0.87      | 4.05     | 1.78     | 3.47      |
| $\alpha(.8)$                   |                 |          |           |          |          |           |          |          |           |
| CS                             | 1.00            | 1.00     | 1.00      | 1.01     | 0.99     | 1.00      | 1.00     | 1.00     | 1.00      |
| MS                             | 1.00            | 1.00     | 1.00      | 1.01     | 0.96     | 0.93      | 3.76     | 1.55     | 2.79      |
| $\alpha(.9)$                   |                 |          |           |          |          |           |          |          |           |
| CS                             | 1.00            | 1.00     | 1.00      | 1.00     | 1.00     | 1.00      | 1.00     | 1.00     | 1.00      |
| MS                             | 1.00            | 1.00     | 1.00      | 1.00     | 0.99     | 0.97      | 2.37     | 1.27     | 1.87      |

Note: Hoshino-Bentler indicates Hoshino and Bentler's (2013) FSR method, Croon FM = Croon's method corrected for correlated uniquenesses at the factor model level, SEM = Structural Equation Modeling (Simultaneous Estimation), with correctly specified unique factor structure, CS = correct structural model specification (*c'* path freely estimated), MS = structural misspecification (*c'* path constrained to 0). All MSE ratios are divided by the MSE for Croon's method corrected for correlated uniquenesses at the measurement model level (Croon MM), i.e.,  $MSE_{Estimator}/MSE_{Croon\_MM}$ .
